1 **Liquid-liquid phase separation of full-length prion protein initiates conformational**  
2 **conversion *in vitro***

3 Hiroya Tange<sup>a,b</sup>, Daisuke Ishibashi<sup>a</sup>, Takehiro Nakagaki<sup>a</sup>, Yuzuru Taguchi<sup>a</sup>, Yuji O. Kamatari<sup>c</sup>,  
4 Hiroki Ozawa<sup>b</sup>, and Noriyuki Nishida<sup>a</sup>

5 <sup>a</sup> Department of Molecular Microbiology and Immunology, Graduate School of Biomedical  
6 Sciences, Nagasaki University, Nagasaki, Japan

7 <sup>b</sup> Department of Neuropsychiatry, Graduate School of Biomedical Sciences, Nagasaki  
8 University, Nagasaki, Japan

9 <sup>c</sup> Life Science Research Center, Gifu University, Gifu, Japan.

10 Corresponding author:

11 Hiroya Tange

12 Phone: (+81) 095-819-7059

13 Fax: (+81) 095-819-7060

14 Email: To whom correspondence should be addressed Hiroya Tange,

15 [bb55416003@ms.nagasaki-u.ac.jp](mailto:bb55416003@ms.nagasaki-u.ac.jp)

16

17

18

19 **Abstract**

20 Prion diseases are characterized by accumulation of amyloid fibrils. The causative agent is  
21 an infectious amyloid that is comprised solely of misfolded prion protein (PrP<sup>Sc</sup>). Prions can  
22 convert PrP<sup>C</sup> to proteinase-resistant PrP (PrP-res) *in vitro*; however, the intermediate steps  
23 involved in the spontaneous conversion remain unknown. We investigated whether  
24 recombinant prion protein (rPrP) can directly convert into PrP-res *via* liquid-liquid phase  
25 separation in the absence of PrP<sup>Sc</sup>. We found that rPrP underwent liquid-liquid phase  
26 separation at the interface of the aqueous two-phase system (ATPS) of polyethylene glycol  
27 (PEG) and dextran, whereas single-phase conditions were not inducible. Fluorescence  
28 recovery assay after photobleaching revealed that the liquid-solid phase transition occurred  
29 within a short time. The aged rPrP-gel acquired proteinase-resistant amyloid accompanied  
30 by  $\beta$ -sheet conversion, as confirmed by western blotting, Fourier transform infrared  
31 spectroscopy, and Congo red staining. The reactions required both the N-terminal region of  
32 rPrP (amino acids 23-89) and kosmotropic salts, suggesting that the kosmotropic anions may  
33 interact with the N-terminal region of rPrP to promote liquid-liquid phase separation. Thus,  
34 structural conversion *via* liquid-liquid phase separation and liquid-solid phase transition are  
35 intermediate steps in the conversion of prions.

36



37 **Keywords**

38 Liquid-liquid phase separation; Liquid-solid phase transition; Prion protein; Kosmotropic salt;

39 Aqueous two-phase system

40 **CRedit authorship contribution statement**

41 Hiroya Tange: Conceptualization, Methodology, Validation, Formal analysis, Investigation,

42 Data Curation, Writing - Original Draft, Review & Editing, Visualization, Funding acquisition

43 Daisuke Ishibashi, Takehiro Nakagaki, Hiroki Ozawa: Resources, supervision

44 Yuji O. Kamatari: Data Curation and formal analysis

45 Yuzuru Taguchi: Writing-Review & Editing, Supervision

46 Noriyuki Nishida: Writing-Review & Editing, Supervision, Management, and Coordination

47 Responsibility for Research Activity Planning and Execution, Funding Acquisition

48

49 **Introduction**

50 Transmissible spongiform encephalopathies (TSEs), also called prion diseases, are  
51 infectious and fatal neurodegenerative diseases with rapidly progressive dementia, such as  
52 Creutzfeldt–Jakob disease (CJD) in humans (1). TSEs are characterized by the accumulation  
53 of misfolded prion protein (PrP<sup>Sc</sup>), which is spontaneously converted from normal prion  
54 protein (PrP<sup>C</sup>). PrP<sup>C</sup> is well preserved among mammalian species and is particularly  
55 expressed in the neurons and tethered to the cell membrane *via* the  
56 glycosylphosphatidylinositol (GPI) anchor (2). The protein-only hypothesis proposes that the  
57 infectious agent, prion, is solely composed of PrP<sup>Sc</sup>. The main biochemical characteristics of  
58 PrP<sup>Sc</sup> are that it is a protease K-resistance fragment (PrP-res) and it has seeding activity to  
59 convert PrP<sup>C</sup> into itself (PrP<sup>Sc</sup>) (3-5). This conversion process presumably proceeds *via* direct  
60 interaction between PrP<sup>C</sup> and PrP<sup>Sc</sup> (6). Several studies have attempted to generate artificial  
61 PrP<sup>Sc</sup>, and the amplification of PrP<sup>Sc</sup> *in vitro* has been successfully demonstrated using  
62 intermittent ultrasonication on the brain homogenates, called protein misfolding cyclic  
63 amplification (PMCA) (7,8). Not only sonication but also shaking of the protein solution can  
64 promote *in vitro* amyloid formation. The quaking-induced conversion (QuIC) assay is now  
65 widely used to detect trace amounts of PrP<sup>Sc</sup> in cerebrospinal fluid using rPrP as a substrate  
66 (9). These lines of experimental evidence suggest that rPrP can be converted to proteinase

67 K-resistant amyloid (rPrP-res) in the presence of PrP<sup>Sc</sup>, with the provision of kinetic energy.

68 However, to explain spontaneous generation and to generate artificial prions, the

69 spontaneous misfolding process from rPrP to rPrP-res in the absence of PrP<sup>Sc</sup> needs to be

70 elucidated.

71 Recently, proteins with intrinsically disordered regions (IDRs) have been shown to undergo

72 liquid phase separation in the cytoplasm and form membrane-less organelles such as stress

73 granules (10). In the liquid phase, IDRs assemble to form a cross- $\beta$  sheet structure. This

74 phenomenon has been associated with the development of neurodegenerative diseases,

75 including Tau protein in Alzheimer's disease and FUS in amyotrophic lateral sclerosis, which

76 are caused by pathogenic amyloids (11,12). Therefore, the aberrant phase transition of

77 amyloidogenic proteins may facilitate pathological amyloid synthesis.

78 The N-terminal of PrP<sup>C</sup> is an IDR comprised of 5 repeats of proline/ glycine-rich sequences,

79 which are called octapeptide repeats. Therefore, to elucidate the spontaneous process

80 involved in the conversion of PrP<sup>C</sup> into PrP<sup>Sc</sup>, we examined whether rPrP can convert into

81 rPrP-res or PrP<sup>Sc</sup> *via* liquid-liquid phase separation, without the use of kinetic energy. In this

82 study, we found that liquid-liquid phase separation and liquid-solid phase transition of rPrP

83 require the interaction between the N-terminal region and kosmotropic anions. Furthermore,

84 the rPrP in gels acquired the features of PrP-res with  $\beta$ -sheet-rich structure and protease-K

85 resistance. These results suggest that the liquid-liquid phase separation and liquid-solid  
86 phase transition can initiate spontaneous conformational conversion of rPrP to PrP-res  
87 without the use of kinetic energy, and that the interaction between kosmotropic anions and  
88 N-terminal region of PrP plays a key role in the conformational conversion process in prion  
89 diseases.

## 90 **Materials and Methods**

### 91 **Protein expression and purification**

92 We prepared 3 rPrPs: full-length human PrP (residues: 23–231), truncated human PrP (residues:  
93 90–231), and Mo-rPrP (residues: 23–231). All constructs were expressed in *Escherichia coli* strain  
94 DH5 $\alpha$ . The expression and purification of rPrPs were performed as previously described (9,47).  
95 After purification, each protein solution was frozen at  $-80^{\circ}\text{C}$  in 150  $\mu\text{L}$  aliquots, which were thawed  
96 for single use. Before using for any experiment, each protein solution was centrifuged at 15,000  
97 rpm for 10 min at room temperature ( $28^{\circ}\text{C}$ ). To prepare labeled rPrP, Alexa Fluor 488 Microscale  
98 Protein Labeling Kit (A30006, Invitrogen, Carlsbad, CA, USA) was used. The procedure was  
99 performed in accordance with the manufacturer's instructions.

### 100 **Disorder propensity and charge prediction**

101 Disorder propensity was calculated using PrDOS (18), charge prediction was performed using  
102 EMBOSS (19,20), and the hydrophilic region was calculated using ProtScale (21). The amino

103 acid sequence from Uniprot (P04156) was used.

104 **Droplet formation assay (polymer and salt solution preparation)**

105 Polymer solutions were prepared from polyethylene glycol (PEG) (MW: 6000) (Wako, Osaka,  
106 Japan) and dextran (MW: 180,000) (Nacalai Chemical, Kyoto, Japan). Each component was  
107 dissolved in dH<sub>2</sub>O and prepared as 50% PEG and 25% dextran (w/v) and stored at 4°C in 1 mL  
108 aliquots. The phase diagram was created by direct observation of polymer droplets using  
109 differential interference contrast microscopy using (DIC). PEG-dextran polymer solutions were  
110 prepared as 1-10 % (wt/vol) of each polymer in 20 µL of solution. The polymer solutions were  
111 vigorously vortexed, and 5 µL of the solution was loaded onto a slide glass. For confocal  
112 microscopy observation with fluorescence, 0.01% rhodamine-PEG (#PG1-RB-5k, Nanocs, New  
113 York, NY, USA) was used. For salt solutions, we prepared 2 M stocks of NaCl, Na<sub>2</sub>S<sub>2</sub>O<sub>3</sub>, Na<sub>2</sub>CO<sub>3</sub>  
114 (Wako, Osaka, Japan) Na<sub>3</sub>Citrate, Na<sub>2</sub>SO<sub>4</sub>, and (NH<sub>4</sub>)<sub>2</sub>SO<sub>4</sub> (Nacalai Chemical, Kyoto, Japan).  
115 Each solution was stored at room temperature. To prepare the aqueous two-phase system  
116 (ATPS) solution, each polymer solution was mixed at concentrations ranging from 1.5% to 13.5%  
117 with 200 mM salt (final: 1–9 wt% of each polymer, PEG/ dextran with 120 mM salt). Then, the  
118 solution was pipetted well and vigorously vortexed. Experiments were performed on a scale of 50  
119 µL (52.6 µl with Thioflavin T [ThT]); 2.6 µL of 1 mM ThT (final concentration: 50 µM) was added  
120 30 µl of ATPS solution and then Next, 20 µl of rPrP solution (final concentration: 2–10 µM) was

121 added to the ATPS solution and gently pipetted 10–15 times. The entire solution was applied to a  
122 glass slide or 96-well plate (#165305, Thermo Fisher Scientific, Waltham, MA, USA) for  
123 microscopic observation. Droplet observation was performed using confocal microscopy  
124 (#LMS700; Carl Zeiss, Oberkochen, Germany) and DIC microscopy (Axioskop2; Carl Zeiss,  
125 Oberkochen, Germany) with 20x and 40x objective lenses. To evaluate ThT fluorescence, Colibri  
126 7 (Carl Zeiss, Oberkochen, Germany) was used as a luminous source at a wavelength of 485 nm.  
127 Images were acquired with exposures of 250 ms (low exposure), 500 ms, and 2000 ms (high  
128 exposure). The pH was adjusted using NaOH (1N) or HCl (1N) and confirmed by test paper. For  
129 droplet aging, the samples were applied to a 96-well plate or Eppendorf tube incubated at 37°C  
130 for 30 min to 72 h. All experiments were performed in triplicate.

### 131 **Congo red staining**

132 The samples were incubated for 72 h at 37°C in the ATPS solution. After incubation, 200 µl of  
133 dH<sub>2</sub>O was added and pipetted well. The aged gels were collected by centrifugation at 15,000 rpm  
134 for 10 min at room temperature and were stained with 50 µL of 1% Congo red (#C8,445-3; Aldrich)  
135 solution for 30 min in an Eppendorf tube at room temperature. After staining, the sample was  
136 centrifuged again under similar conditions, and the supernatant was discarded. The pellet was  
137 washed with 50 µL of dH<sub>2</sub>O by pipetting, centrifuged again under similar conditions, and the  
138 supernatant was discarded. The pellet was suspended in 20 µL of dH<sub>2</sub>O, and 5 µL was applied

139 on a glass slide, followed by sealing with a cover glass. Microscopic observation was performed  
140 using a confocal microscope (Nikon, Tokyo, Japan) with a polarization filter. Images were acquired  
141 using the NIS-Elements C software.

#### 142 **Fluorescence after photobleaching assay**

143 FRAP was performed using the LMS700. Alexa488-labeled human rPrP was diluted 1:18 with  
144 native human rPrP (final: 13  $\mu$ M). Bleaching was performed with 100% transmission of a 405,  
145 488, or 500 nm laser. Pre-bleaching images were taken for 3s (1s frame rate, 3 frames), whereas  
146 post-bleaching images were acquired for the following 120 s (1s frame rate, 120 frames) and  
147 analyzed with ZEN. The samples named "0 min" were taken in less than 5 min, including the set  
148 up. The sizes of the bleached area and background area were set in the first experiment. For  
149 each image, the bleached region and background region were calculated using ZEN, and the  
150 background was subtracted during analysis.

#### 151 **Sarkosyl and proteinase K treatments**

152 Sarkosyl and PK were purchased from Sigma-Aldrich. For sarkosyl treatment, the sample was  
153 incubated in the ATPS solution at 37°C for 30 min, and 200  $\mu$ L of dH<sub>2</sub>O was added to the sample  
154 and pipetted well. The entire solution was centrifuged at 15,000 rpm for 10 min at room  
155 temperature. Supernatant-1 (S1) and Pellet-1 (P1) were collected. P1 was suspended in 25  $\mu$ L of  
156 dH<sub>2</sub>O or 1% sarkosyl and then incubated at 37°C for 10 min. After incubation, samples were

157 centrifuged at 15,000 rpm for 30 min at room temperature and then Supernatant-2 (S2) and Pellet-  
158 2 (P2) were retrieved. The PK solution (10 µg/ml) was prepared in dH<sub>2</sub>O . The samples were  
159 incubated at 37°C for 72 h in an Eppendorf tube. As a negative control, the solution containing  
160 the same amount of rPrP was treated with the PK solution. The samples and PK solution were  
161 mixed by pipetting, applied to a 96-well plate, and incubated at 37°C. DIC microscopy was  
162 performed at the beginning of the reaction (0 min) and the end of incubation (30 min). Samples  
163 were retrieved from the 96-well plate, and each well was washed with 100 µL of dH<sub>2</sub>O. The entire  
164 sample was collected in an Eppendorf tube and centrifuged at 15,000 rpm for 10 min at room  
165 temperature. The supernatant and pellet were collected. In both experiments, the supernatant  
166 was denatured with 6x SDS sample buffer (50 mM Tris-HCl pH 6.8, 5% glycerol, 1.6% SDS, and  
167 100 mM dithiothreitol). The pellet was then resuspended in 1x SDS buffer and boiled at 95°C for  
168 10 min for SDS-PAGE.

#### 169 **Immunoblotting**

170 Samples were loaded to 18% acrylamide gel for SDS-PAGE and then transferred to Poly  
171 Vinylidene Di-Fluoride membrane. The membrane was blocked using 5%(w/v) skim milk with  
172 TBST (10 mM Tris-HCl pH 7.8, 100 mM NaCl, 0.1% Tween 20) at RT for 1 h. To detect PrP, the  
173 membrane was incubated with primary antibody R20 (1:1000 diluted with 1% skim milk) for 1 h  
174 at RT (48). Horseradish peroxidase-conjugated anti-rabbit IgG (1:10,000, GE Healthcare Life



175 Sciences, Fairfield, CT, USA) was used as the secondary antibody. Protein bands were visualized  
176 using Clarity Western ECL substrate (Bio-Rad, Hercules, CA, USA). Band intensity was quantified  
177 using ImageJ.

### 178 **Quantifying ThT fluorescence**

179 Fluorescence intensity was quantified with FLUOstar Omega (BMG Labtech, Ortenberg,  
180 Germany) in a 96-well plate with a spiral scan. The 96-well plate was covered with sealing tape  
181 (#J676060, Greiner, Kremsmünster, Austria), incubated at 37°C, and monitored by the bottom  
182 reading of the fluorescence intensity every hour up to 48 h using monochromators or filters with  
183 wavelengths of 448 nm (excitation) and 482 nm (emission).

### 184 **Fourier transform infrared spectroscopy analysis**

185 Fourier transform infrared spectroscopy (FTIR) spectra were measured using a JASCO FT/IR-  
186 4700ST with attenuated total reflection. Five microliters of the sample was loaded onto the grid.  
187 To prepare the sample for FTIR, we first prepared a 30x concentrated sample (aged for 72 h) from  
188 1.5 mL scale to 50  $\mu$ L. Aged gel was collected by centrifugation, as described above, and  
189 suspended in dH<sub>2</sub>O.

## 190 **Results**

### 191 **rPrP undergoes liquid–liquid phase separation in ATPS**

192 In general, polymers such as PEG or dextran are used to induce liquid-liquid phase

193 separation of proteins as crowding agents (13). First, we tried with a single polymer solution;  
194 however, rPrP did not undergo liquid-liquid phase separation but resulted in salting out with  
195 both PEG and dextran at concentrations greater than 10% (Sup Fig. 1A). We applied ATPS,  
196 which is composed of PEG and dextran, because the interface of ATPS may function like a  
197 cellular surface (14). The droplets appeared at the interface of the polymer fractions  
198 immediately after mixing 10  $\mu$ M rPrP with an ATPS mixture containing sodium thiosulfate  
199 ( $\text{Na}_2\text{S}_2\text{O}_3$ ). We tested combinations of various concentrations of the polymers and  
200 investigated where ATPS could form an interface (15) (Fig. 1A, B). Below the binodal curve,  
201 no droplet was formed at the interface of the ATPS. Under such conditions, rPrP precipitated  
202 as amorphous aggregates at the bottom of wells after 24 h of incubation (Sup Fig. 1B). With  
203 6%/ 6% PEG/ dextran, the spherical droplets were observed at the interface of ATPS and  
204 bottom of the well, and the amorphous aggregates were visualized by ThT. The spherical  
205 droplets appeared even more efficiently with 9%/ 9% PEG/ dextran (Fig. 1B, Sup Fig. 1B).  
206 Quantification of ThT fluorescence intensity showed that 9%/ 9% of PEG/ dextran had the  
207 highest fluorescence intensity after 24 h of incubation (Supplementary Fig. 1C). Therefore,  
208 we set the experimental conditions of 9%/ 9% PEG/dextran with 120 mM  $\text{Na}_2\text{S}_2\text{O}_3$  in the  
209 following experiments, unless otherwise noted. ThT-positive aggregates appeared to  
210 correlate with the concentration of rPrP for up to 6  $\mu$ M; spherical droplets with clear ThT

211 fluorescence appeared from 8  $\mu\text{M}$  rPrP and were most efficient at 10  $\mu\text{M}$  of rPrP  
212 (Supplementary Fig. 2A). The fluorescence intensity was significantly high in the presence  
213 of 10  $\mu\text{M}$  of rPrP (Sup Fig. 2B). To confirm if the droplets consisted of rPrP, we performed a  
214 similar experiment with Alexa 488-labeled rPrP and found that the fluorescence was equally  
215 distributed in all the droplets (Fig. 1C). The droplets could be visualized by ThT immediately  
216 after their formation, suggesting that  $\beta$ -sheet formation of rPrP was initiated inside the fresh  
217 formed droplets.

#### 218 **Kosmotropic anion species induce droplet formation**

219 We next investigated the influence of the salt types on droplet formation, and screened  
220 various salts according to the Hofmeister series. Sodium salts, such as NaCl,  $\text{Na}_2\text{S}_2\text{O}_3$ ,  
221  $\text{Na}_2\text{CO}_3$ ,  $\text{Na}_3\text{Citrate}$ ,  $\text{Na}_2\text{SO}_4$ , and  $(\text{NH}_4)_2\text{SO}_4$ .  $\text{Na}_2\text{SO}_4$ ,  $\text{Na}_3\text{Citrate}$ , and  $(\text{NH}_4)_2\text{SO}_4$  were  
222 tested. We found that the kosmotropic salts induced droplet formation, whereas NaCl and  
223  $\text{Na}_2\text{CO}_3$  did not (Sup Fig. 3A). The droplets in the  $\text{Na}_2\text{CO}_3$  samples had almost no  
224 fluorescence intensity because the alkaline conditions caused by  $\text{Na}_2\text{CO}_3$  affected the ThT,  
225 resulting in loss of fluorescence ability (16). These results suggest that kosmotropic anions  
226 have a strong influence on the rPrP droplet formation. We next examined the influence of pH  
227 under conditions of 9%/ 9% of PEG/ dextran with 120 mM  $\text{Na}_2\text{S}_2\text{O}_3$ . At pH 4, a small number  
228 of spherical droplets were observed, but most of them formed ThT-positive, granule-like

229 aggregates with a low value of circularity,. These granule-like aggregates did not fuse with  
230 each other. Among the conditions we tested, the droplets were most efficiently formed at  
231 neural pH, although we could not fully evaluate the formation efficiencies at pH 12 due to  
232 loss of ThT fluorescence (Sup Fig. 3C). We confirmed that 120 mM  $\text{Na}_2\text{S}_2\text{O}_3$  and neural pH  
233 were the optimal conditions for our experiments.

### 234 **The droplets of rPrP undergo liquid-solid phase transition**

235 To investigate the properties of the droplets, we continuously observed their behavior. The  
236 fresh droplets floating at the interface seamlessly fused with each other, suggesting that the  
237 droplets were in the liquid phase (Fig. 2A). Further, rPrP immediately condensed to form  
238 droplets at the interface of PEG/ dextran by adding  $\text{Na}_2\text{S}_2\text{O}_3$ . In addition, fluorescence-  
239 labeled PEG colocalized with rPrP in the droplets, suggesting that PEG was bound to rPrP  
240 (Fig. 2B). Next, we analyzed the fluorescence recovery after photobleaching of the droplets,  
241 before and after 1 h of incubation. Fresh droplets, immediately after liquid-liquid phase  
242 separation (0 min), showed full recovery of the intensity within 60 s after photobleaching,  
243 whereas the droplets incubated for 1 h at 37°C showed no recovery throughout the  
244 observation period (Fig. 2C, D), suggesting that the droplets of rPrP underwent liquid–solid  
245 phase transition and became rPrP-gels.

### 246 **The N-terminal region of rPrP (residues 23–89) drives liquid-liquid phase separation**

247 **and liquid-solid phase transition**

248 The N-terminal region of PrP<sup>C</sup> is known to be an IDR, whereas its C-terminal consists of  
249 stable secondary structures with 3  $\alpha$ -helices, as revealed by Nuclear Magnetic Resonance  
250 study, consistent with the prediction result from PrDOS (17,18). Under biological conditions,  
251 PrP<sup>C</sup> is not phosphorylated or methylated but is a GPI-anchored protein with two  
252 glycosylation sites (Fig. 3A). To determine whether the IDRs of rPrP influence liquid-liquid  
253 phase separation, we first calculated its disordered propensity, hydrophobicity, and electric  
254 charge (Fig. 3B). This region coincides with the positively charged region predicted by  
255 EMBOSS and the hydrophilic region calculated from Protscale (19-21). To elucidate the role  
256 of the N-terminal region, we compared the behavior of the full-length rPrP and N-terminally  
257 truncated mutant, rPrP  $\Delta$  (23–89) in ATPS. We found that rPrP  $\Delta$  (23–89) did not increase  
258 the fluorescence intensity even with Na<sub>2</sub>S<sub>2</sub>O<sub>3</sub>, but formed slightly ThT-positive aggregates at  
259 the interface. These aggregates showed no increase in ThT fluorescence throughout the  
260 observation period of up to 48 h, whereas the droplet of full-length rPrP increased the  
261 fluorescence intensity over time (Fig. 3C-E). Furthermore, the fluorescence intensity was  
262 significantly higher than that of rPrP  $\Delta$  (23–89) with Na<sub>2</sub>S<sub>2</sub>O<sub>3</sub> at 1 h and became more striking  
263 after 48 h (Fig. 3F, G). Full-length mouse rPrP (Mo-rPrP-residues: 23–231) also showed  
264 similar results (Supplementary Fig. 4 A, B).

265 **Liquid-solid phase transition involves conformational conversion of the prion protein**

266 Because the rapid growth of ThT fluorescence coincides with the timing of a liquid–solid  
267 phase transition (Fig. 2C, D), we postulated that the droplets rapidly became insoluble and  
268 eventually matured to acquire the properties of PrP<sup>Sc</sup>. To verify this, we incubated the droplets  
269 for 30 min and then collected them by centrifugation. The rPrP-gels were ThT-positive and  
270 did not dissolve in water (Fig. 4A). Subsequently, we resuspended the gels in 1% sarkosyl  
271 and reprecipitated them by centrifugation. Western blot analysis showed that rPrP was  
272 insoluble in 1% sarkosyl solution (Fig. 4B). There was no significant difference in the insoluble  
273 fraction (P2), with or without treatment (Fig. 4C). Next, we examined whether these PrPs in  
274 the gels acquired PK resistance. We aged rPrP-gels for 72 h and then digested them with  
275 PK. The appearance of aged gels remained unchanged after PK digestion (Fig. 4D).  
276 SDS–PAGE and western blotting of the aged gels collected by centrifugation showed that  
277 the aged droplets contained oligomers of rPrP, and 40% of rPrP remained undigested (Fig.  
278 4E, F). A small PrP-res fragment was detected around 10-15 kDa, resembling the PMCA  
279 product (25). We could not disrupt the aged gel by sonication to improve the penetration of  
280 proteinase. We further attempted to confirm that the rPrP-gel was composed of amyloid. The  
281 aged gels stained positively with Congo red, although they did not show apple-green  
282 birefringence under cross-polarized light (Fig. 4G). A similar observation was reported in

283 human amyloid spherulites composed of islet amyloid polypeptide in the pancreatic tissue of  
284 type 2 diabetes mellitus (22). However, the aged gel did not show the Maltese cross under  
285 cross-polarized light, which is a characteristic of spherulites. To analyze the secondary  
286 structure of the aged gel, we performed FTIR analysis. FTIR analysis showed that the aged  
287 gels had a distinctive peak at  $1620\text{ cm}^{-1}$  in the  $\beta$ -sheet region of the second-derivative  
288 spectra, which shifted from  $1651\text{ cm}^{-1}$  in the  $\alpha$ -helix region from the native form of rPrP (Fig.  
289 4H). Moreover, they were stable for months in water (data not shown). These results suggest  
290 that rPrP is converted into PrP-res inside the droplets, acquiring  $\beta$ -sheet structure, detergent-  
291 insolubility, and PK resistance.

## 292 **Discussion**

293 We have demonstrated that rPrP undergoes liquid-liquid phase separation at the ATPS  
294 interface. IDR in the N-terminal region of PrP<sup>C</sup> (residues: 23-89) and kosmotropic anions in  
295 the ATPS were essential for the overall reaction. The rPrP liquid droplets subsequently  
296 showed liquid–solid phase transition within an hour, and the aged rPrP gels contained  $\beta$ -  
297 sheet-rich, sarkosyl-insoluble, and PK-resistant amyloid. These data suggest that PrP<sup>C</sup> in the  
298 liquid phase can initiate spontaneous conversion to amyloids without the provision of kinetic  
299 energy or seeding.

300 ATPS has been used for a wide range of purposes, such as purification of enzymes, nucleic

301 acids, and viruses for providing a gentle environment for biomolecules and stabilizing their  
302 structure (15,23). The partitioning behavior in ATPS has been well documented. In protein  
303 purification, monomeric IgG could be collected separately in the PEG-rich fraction because  
304 of its positive charge (24). Such convention by ATPS can facilitate interactions of the  
305 sequestered molecules, as demonstrated by DNA and actin fibers separately interacting and  
306 polymerizing inside the dextran phase, called cell-sized aqueous microdroplets, imitating cell-  
307 like crowded microenvironments (25). Similarly, our present results could be interpreted from  
308 a similar viewpoint. It is conceivable that rPrP, which has positive charges like IgG in the IDR,  
309 was sequestered to the PEG phase at first and then when it was sufficiently condensed, it  
310 formed a liquid phase on its own owing to the interactions between the IDRs. Similar to many  
311 other proteins known to undergo liquid-liquid phase separation, the region consists of 5  
312 repeats of a glycine-rich motif and contains proline and aromatic amino acids, that is,  
313 tryptophan.

314 The kosmotropic anions have been shown to stabilize the structure of proteins to enhance  
315 amyloid formation *in vitro* (26,27). It has been shown that the efficiency of amyloid formation  
316 from prion protein is in accordance with the Hofmeister series (28,29). In addition,  
317 kosmotropic anions have been shown to drastically improve the detection limit of pathological  
318 amyloids, including prions (30). Therefore, kosmotropic anions may play a role in promoting



319 structural stabilization of the proteins, facilitating their transformation to amyloids after the  
320 formation of droplets. However, further investigation is required to elucidate the role of  
321 kosmotropic anions from the viewpoint of the electrical effect.

322 It is unlikely that the fluorescence-labeled PEG that colocalized with the droplet of rPrP  
323 contribute directly to the reactions of rPrP in the liquid phase separation because it hardly  
324 affects the conversion properties of rPrP to PrP-res (31). Analogous to other proteins that  
325 undergo liquid-liquid phase separation, the proline and glycine-rich N-terminal IDR of rPrP  
326 are very flexible and multivalent because of the periodically located tryptophan residues;  
327 these features enable efficient intermolecular interactions and consequently liquid-liquid  
328 phase separation. The liquid-phase formation *via* IDR may subsequently facilitate  
329 interactions between the C-terminal regions, and finally evoke parallel  $\beta$ -sheet conversion of  
330 the entire molecule. Therefore, it does not require agitation to catalyze the reactions. This  
331 may be in contrast to the facilitation of conversion by mechanical agitation, where natively  
332 folded protein molecules at the air/ water interface are denatured and the forcefully exposed  
333 hydrophobic residues presumably enable efficient intermolecular binding, and eventually  
334 conversion (32-34).

335 Our view that the IDR of rPrP drives liquid-liquid phase separation and that liquid-solid  
336 phase transition is accompanied by the conversion of the C-terminal region is valid. It has

337 been shown that IDR assembles protein molecules and forms a cross- $\beta$  structure comprising  
338 stacks of short  $\beta$ -strands in the process of liquid-solid phase transition (35).

339 Similar to other proteins that are reported to undergo liquid-liquid phase separation, IDRs of  
340 PrP, that is, octapeptide (PHGGGWGQ) repeats, are very flexible and multivalent; thus, the  
341 octapeptide region quickly forms a short cross- $\beta$  structure, as suggested by the ThT positivity  
342 at the very beginning of droplet formation. Inside the droplet, the flexible intermolecular  
343 interactions of rPrP through the octapeptide repeats maintain the C-terminal regions of rPrP  
344 in the proximity of each other until they are fully converted into  $\beta$ -sheet-rich structures. In  
345 addition, repeats of the motif have advantages in the liquid phase because of the high  
346 plasticity of intermolecular bindings under shear stress. In summary, we propose that (i) the  
347 N-terminal region with positive charges induces condensation of rPrP in the PEG phase, (ii)  
348 the charges are neutralized by the kosmotropic anion, inducing direct interaction of dipole  
349 (G,Q) and  $\pi$ - $\pi$  stacking (W) of the octa-peptide region to form a short cross- $\beta$  sheet structure  
350 (36), (iii) the molecular distance of the C-terminal region is reduced enabling them to become  
351 close to each other, leading to the polymerization and  $\beta$ -sheet conversion of the entire rPrP  
352 to the amyloid. (Fig 5A, B). This process may be similar to the *in silico* simulation model  
353 suggesting that the conversion process started from the N-terminal region (37).

354 Although our experimental conditions were highly artificial, it is still worthy to consider the

355 possibility that the liquid-liquid phase separation of PrP<sup>C</sup> could occur *in vivo*. Liquid-liquid  
356 phase separation is a phenomenon that was initially reported for intracellular proteins but  
357 later, proteins associated with the cell membranes were also shown to undergo liquid-liquid  
358 phase separation. Recently, it has been reported that zona occludens, a membrane-  
359 associated scaffolding protein, underwent liquid-liquid phase separation to form functional  
360 tight junctions between cells (38), suggesting that the protein complex attached to the  
361 membrane certainly has the properties of liquid. PrP<sup>C</sup> is anchored to the cell membrane and  
362 can interact with various macromolecules, including proteins, RNA, and lipids (39-41). These  
363 macro-biomolecules are intertwined to each other and might drive liquid-liquid phase  
364 separation of the membrane protein. Interestingly, it has been demonstrated that A $\beta$ -  
365 oligomers and DNA-aptamers drive the liquid-solid phase transition of rPrP through the  
366 interaction of amino acid residues around 90-120 (42,43). Furthermore, both full-length prion  
367 protein and prion protein peptide (amino acid, 23-144) could form proteinase resistant,  
368 spherical-ellipsoid aggregates that grow as amyloid fibrils by the addition of detergent or  
369 polysaccharides, and thus supporting our hypothesis that liquid-solid phase transition is  
370 associated with prion diseases (44-46). Thus, our results suggest that PrP can autonomously  
371 form a liquid phase triggered by the interaction between the N-terminal region under certain  
372 conditions. These phenomena possibly happen in the following situation: when PrP<sup>C</sup> are

373 packed in endocytic vesicles, for example exosome, or PrP<sup>C</sup> and other proteins complexes  
374 are crowded at the cell membrane, such as lipid raft. In such situations, interactions between  
375 multivalent and flexible IDR of PrP might further condense the molecules, restraining their  
376 motions and directions. This might also potentially be a mechanism for the efficient  
377 propagation of PrP<sup>Sc</sup> *in vivo* without any mechanical agitation. Taken together,  
378 microenvironments *in vivo* with high concentrations of kosmotropic anions may drive liquid-  
379 liquid phase separation of PrP<sup>C</sup>, leading to spontaneous intra- and/or extracellular PrP-  
380 amyloid formation. Further experiments using cell culture and *in vivo* imaging are needed to  
381 elucidate whether PrP<sup>C</sup> can undergo liquid-liquid phase separation *in vivo*.

## 382 **Conclusions**

383 Liquid-liquid phase separation of full-length rPrP using ATPS was demonstrated. The  
384 droplets of rPrP appeared only at the interface between PEG and dextran. The N-terminal  
385 region of prion protein (amino acids 23-89) and kosmotropic anions in neutral pH were  
386 essential for this reaction. Furthermore, the liquid-solid phase transition was found to be  
387 accompanied by  $\beta$ -sheet transition, resulting in proteinase K-resistance. These results  
388 suggest that spontaneous conversion of PrP<sup>C</sup> to PrP<sup>Sc</sup> amyloid may be promoted by liquid-  
389 liquid phase separation at the interface of biopolymers on the cell surface. Because of the  
390 limitations of our *in vitro* study, further approaches are required to elucidate whether the

391 liquid-liquid phase separation of PrP<sup>C</sup> on the cell surface can be provoked.

### 392 **Declaration of Competing Interest**

393 The authors declare that they have no known competing financial interests or personal  
394 relationships that could have appeared to influence the work reported in this paper.

### 395 **Acknowledgments**

396 We would like to thank Atsuko Matsuo, Hirono Nakata, and Ren Matsushima for technical  
397 assistance, and Toshiyuki Tsurumoto and Ryoichi Mori for polarized light microscopy  
398 observations. We would like to thank Editage ([www.editage.com](http://www.editage.com)) for English language editing.

399 This research was supported by JSPS KAKENHI Grant numbers JP19K22600 and Sasakawa  
400 Scientific Research Grant from The Japan Science Society.

### 401 **References**

- 402 1. Prusiner S. B., Prions. *Proc. Natl. Acad. Sci. U.S.A.* 95, 13363–13383 (1998)
- 403 2. X. Roucou, M. Gains, A. C. LeBlanc, Neuroprotective Functions of Prion Protein. *J. Neurosci.*  
404 *Res.* 75, 153–161 (2004).
- 405 3. S. B. Prusiner, et al., Scrapie prions aggregate to form amyloid-like birefringent rods. *Cell* 35,  
406 349–358 (1983).
- 407 4. J. Safar, et al., Eight prion strains have PrP<sup>Sc</sup> molecules with different conformations. *Nat.*  
408 *Med.* 4, 1157–1165 (1998).

- 409 5. Prusiner SB (1991) Molecular biology of prion diseases. *Science* 252(5012):1515–1522.
- 410 6. F. E. Cohen, S. B. Prusiner, Pathologic Conformations of Prion Proteins. *Annu. Rev. Biochem.*
- 411 67, 793–819 (1998).
- 412 7. G. P. Saborio, B. Permanne, C. Soto, Sensitive detection of pathological prion protein by cyclic
- 413 amplification of protein misfolding. *Nature* 411, 810–813 (2001).
- 414 8. J. Castilla, et al., Cell-free propagation of prion strains. *EMBO J.* 27, 2557–2566 (2008).
- 415 9. R. Atarashi, et al., Ultrasensitive human prion detection in cerebrospinal fluid by real-time
- 416 quaking-induced conversion. *Nat. Med.* 17, 175–178 (2011).
- 417 10. A. A. Hyman, C. A. Weber, F. Jülicher, Liquid-Liquid Phase Separation in Biology. *Annu. Rev.*
- 418 *Cell Dev. Biol.* 30, 39–58 (2014).
- 419 11. A. Patel, et al., A Liquid-to-Solid Phase Transition of the ALS Protein FUS Accelerated by
- 420 Disease Mutation. *Cell* 162, 1066–1077 (2015).
- 421 12. S. Wegmann, et al., Tau protein liquid–liquid phase separation can initiate tau aggregation.
- 422 *EMBO J.* 37, 1–21 (2018).
- 423 13. Y. Shin, C. P. Brangwynne, Liquid phase condensation in cell physiology and disease. *Science*
- 424 357, eaaf4382 (2017)
- 425 14. E. Article, et al., Chemical Science A new design for an artificial cell: polymer microcapsules
- 426 with addressable inner compartments that can harbor biomolecules, colloids or microbial species.

- 427 6893–6903 (2017).
- 428 15. M. Iqbal, et al., Aqueous two-phase system (ATPS): an overview and advances in its  
429 applications. *Biol. Proced. Online* 18, 1–18 (2016).
- 430 16. E. V Hackl, J. Darkwah, G. Smith, I. Ermolina, Effect of acidic and basic pH on Thioflavin T  
431 absorbance and fluorescence. 249–261 (2015).
- 432 17. R. Zahn, et al., NMR solution structure of the human prion protein. *Proc. Natl. Acad. Sci. U.*  
433 *S. A.* 97, 145–150 (2000).
- 434 18. T. Ishida, K. Kinoshita, PrDOS: Prediction of disordered protein regions from amino acid  
435 sequence. *Nucleic Acids Res.* 35, 460–464 (2007).
- 436 19. P. Rice, L. Longden, A. Bleasby, EMBOSS: The European Molecular Biology Open Software  
437 Suite. *Trends Genet.* 16, 276–277 (2000).
- 438 20. E. Gasteiger et al., ExPASy: The proteomics server for in-depth protein knowledge and  
439 analysis. *Nucleic Acids Res.* 31, 3784–3788 (2003).
- 440 21. Sweet RM, Eisenberg D. Correlation of sequence hydrophobicities measures similarity in  
441 three-dimensional protein structure. *J Mol Biol.* 1983;171(4):479–488.
- 442 22. C. Exley, E. House, T. Patel, L. Wu, P. E. Fraser, amyloid spherulites in vitro. *Journal of*  
443 *Inorganic Biochemistry* 104, 1125–1129 (2010).
- 444 23. J. Benavides, M. Rito-Palomares, J. A. Asenjo, Aqueous Two-Phase Systems. *Compr.*

- 445 Biotechnol. Second Ed. 2, 697–713 (2011).
- 446 24. C. Shibata, K. Iwashita, K. Shiraki, Selective separation method of aggregates from IgG  
447 solution by aqueous two-phase system. *Protein Expr. Purif.* 161, 57–62 (2019).
- 448 25. N. Nakatani, et al., Specific spatial localization of actin and dna in a water/water microdroplet:  
449 Self-emergence of a cell-like structure. *ChemBioChem* 19, 1370–1374 (2018).
- 450 26. Blancas-Mejía LM, Tischler A, Thompson JR, et al. Kinetic control in protein folding for light  
451 chain amyloidosis and the differential effects of somatic mutations. *J Mol Biol.* 426(2):347-361,  
452 (2014).
- 453 27. L. A. Sikkink, M. Ramirez-alvarado, Biophysical Chemistry Salts enhance both protein stability  
454 and amyloid formation of an immunoglobulin light chain. 135, 25–31 (2008).
- 455 28. R. Diaz-Espinoza, A. Mukherjee, C. Soto, Kosmotropic anions promote conversion of  
456 recombinant prion protein into a PrP Sc-like misfolded form. *PLoS ONE* 7, 1–9 (2012).
- 457 29. V. Yeh, et al., The Hofmeister effect on amyloid formation using yeast prion protein. 19, 47–  
458 56 (2010).
- 459 30. Metrick MA 2nd, do Carmo Ferreira N, Saijo E, et al. Million-fold sensitivity enhancement in  
460 proteopathic seed amplification assays for biospecimens by Hofmeister ion comparisons. *Proc*  
461 *Natl Acad Sci U S A.* 2019
- 462 31. G. S. Baron, K. Wehrly, D. W. Dorward, B. Chesebro, B. Caughey, Conversion of raft



- 463 associated prion protein to the protease-resistant state requires insertion of PrP-res (PrPSc) into  
464 contiguous membranes. *EMBO J.* 21, 1031–1040 (2002).
- 465 32. J. Dorosz, R. Volinsky, E. Bazar, S. Kolusheva, R. Jelinek, Phospholipid-induced fibrillation of  
466 a prion amyloidogenic determinant at the air /water interface. *Langmuir* 25, 12501–12506 (2009).
- 467 33. K. Sankaranarayanan, A. Dhathathreyan, J. Krägel, R. Miller, Interfacial viscoelasticity of  
468 myoglobin at air/water and air/solution interfaces: Role of folding and clustering. *J. Phys. Chem.*  
469 *B* 116, 895–902 (2012).
- 470 34. V. Sluzky, J. A. Tamada, A. M. Klibanov, R. Langer, Kinetics of insulin aggregation in aqueous  
471 solutions upon agitation in the presence of hydrophobic surfaces. *Proc. Natl. Acad. Sci. U. S. A.*  
472 88, 9377–9381 (1991).
- 473 35. Kato M, et al. Cell-free formation of RNA granules: Low complexity sequence domains form  
474 dynamic fibers within hydrogels. *Cell.* 2012; 149:753–767.
- 475 36. C. P. Brangwynne, P. Tompa, R. V Pappu, Polymer physics of intracellular phase transitions.  
476 *Nat. Phys* 11, 899–904 (2015).
- 477 37. G. Spagnolli, et al., Full atomistic model of prion structure and conversion. *PLoS Pathog.* 15,  
478 1–18 (2019).
- 479 38. O. Beutel, R. Maraschini, K. Pombo-garci, A. Honigmann, A. Honigmann, Phase Separation of  
480 Zonula Occludens Proteins Drives Formation of Tight Junctions. 923–936 (2019).

- 481 39. N. R. Deleault, R. W. Lucassen, S. Supattapone, RNA molecules stimulate prion protein  
482 conversion. *Nature* 425, 717–720 (2003).
- 483 40. N. Sanghera, T. J. T. Pinheiro, Binding of prion protein to lipid membranes and implications  
484 for prion conversion. *J. Mol. Biol.* 315, 1241–1256 (2002).
- 485 41. N. R. Deleault, et al., Isolation of phosphatidylethanolamine as a solitary cofactor for prion  
486 formation in the absence of nucleic acids. *Proc. Natl. Acad. Sci.* 109, 8546–8551 (2012).
- 487 42. C. O. Matos, et al., Liquid-liquid phase separation and fibrillation of the prion protein  
488 modulated by a high-affinity DNA aptamer. *FASEB J.* n/a, 1–21 (2019).
- 489 43. Kostylev, M. A. et al. Liquid and Hydrogel Phases of PrPC Linked to Conformation Shifts and  
490 Triggered by Alzheimer’s Amyloid- $\beta$  Oligomers. *Mol. Cell* 72, 426-443.e12 (2018).
- 491 44. R. A. Moore, S. F. Hayes, E. R. Fischer, S. A. Priola, Amyloid Formation via Supramolecular  
492 Peptide Assemblies. 46 (2007).
- 493 45. L. Xiong, L. D. Raymond, S. F. Hayes, G. J. Raymond, B. Caughey, Conformational change,  
494 aggregation and fibril formation induced by detergent treatments of cellular prion protein. 669–  
495 678 (2001).
- 496 46. L. J. Ellett, et al., Glycosaminoglycan sulfation determines the biochemical properties of prion  
497 protein aggregates. 25, 745–755 (2015).
- 498 47. Y. Miyazaki, T. Ishikawa, Y. O. Kamatari, T. Nakagaki, H. Takatsuki, Identification of Alprenolol

499 Hydrochloride as an Anti-prion Compound Using Surface Plasmon Resonance Imaging. 367–377

500 (2019).

501 48. B. Caughey, G. J. Raymond, D. Ernst, R. E. Race, N-terminal truncation of the scrapie-

502 associated form of PrP by lysosomal protease(s): implications regarding the site of conversion of

503 PrP to the protease-resistant state. *J. Virol.* 65, 6597–603 (1991).

#### 504 **Figure legends**

#### 505 **Fig. 1 rPrP undergoes liquid-liquid phase separation in ATPS.**

506 (A) Phase diagram of an ATPS (PEG/ dextran). The binodal curve (solid line) is drawn with

507 approximation ( $R^2=0.8626$ ). Black dots: rPrP fully undergo liquid phase separation. Gray dots:

508 rPrP underwent LLPS with aggregation. White dots: rPrP fully aggregated. Square dots: Average

509 of clouding point. N=3

510 (B) Differential interference contrast (DIC) and fluorescence microscopic images of droplets in the

511 interface of PEG/ dextran after 24 h of incubation. Bar: 50  $\mu\text{m}$ .

512 (C) Confocal microscopic images of rPrP droplets with Alexa 488 labeled rPrP (1:18). Bar: 20  $\mu\text{m}$ .

#### 513 **Fig. 2 rPrP droplets undergo liquid-solid phase transition**

514 (A) Consecutive images of droplets seamlessly combining with each other. Black arrowhead

515 indicates a droplet uniting with another one.

516 (B) Confocal microscopic images of distribution of PEG (0.01% of Rhodamine-PEG: red) and rPrP

517 (1:18 of Alexa488-labeled rPrP: green). Left panel: ATPS/ rPrP solution with dH<sub>2</sub>O. Bar: 200 μM.  
518 Right panel: ATPS/ rPrP solution with 120 mM of sodium thiosulfate. Bar: 100 μm. Both images  
519 were acquired immediately after mixing the polymer and rPrP solution. (C) Confocal microscopic  
520 images from FRAP experiment of a fresh (0 min) droplet (top) and a droplet incubated for 1 h  
521 (bottom). Bar: 5 μm. (D) Fluorescence recovery after photobleaching (FRAP) curves from flesh  
522 droplets (0 min) and droplets incubated for 1 h regarding in 2C. Each dot indicates a value  
523 measured in 3 independent experiments. Line indicates average value. Bar: SD. N=3.

524 **Fig. 3 The N-terminal of PrP is essential for droplet formation and maturation.**

525 (A) Schematic diagram of human rPrP residues 23-231. Red indicates octapeptide repeats region.  
526 Green indicates alpha helix regions. Circles indicates glycosylation sites.

527 (B) Calculation of hydrophobicity, disordered propensity, and electric charge of human prion  
528 protein using Protscale, PrDOS, and EMBOSS. Blue line: hydrophobicity calculated by Protscale.  
529 Black line: electric charge calculated by EMBOSS. Red line: disordered propensity calculated by  
530 PrDOS. Red dot line: threshold of disordered propensity (FP: 5%).

531 (C) DIC and fluorescence microscopic images of rPrP: Sodium thiosulfate at 0 min and 24 h. Even  
532 very small droplets (< 5 μm) with no apparent ThT fluorescence at 0 min could be clearly identified  
533 after 24 h of incubation.

534 (D) DIC and fluorescence microscopic images of rPrP Δ (23-89): Na<sub>2</sub>S<sub>2</sub>O<sub>3</sub> at 0 min and 24 h,

535 acquired h long exposure. (E) ThT fluorescence intensity of rPrP and rPrP  $\Delta$  (23-89) measured in  
536 48 h. Each dot represents a value measured in 3 independent experiments. Line indicates  
537 average of each group. (F, G) Quantification of ThT fluorescence intensity at 0 min and 48 .  
538 \*P<0.0001. Bar represents SD. N=9. Statistical analysis was performed with one-way ANOVA,  
539 followed by the Tukey-Kramer test.

540 **Fig. 4 Biochemical analysis of the rPrP-gel.**

541 (A) DIC and fluorescence microscopic images of the rPrP-gel incubated for 30 min in ATPS,  
542 collected by centrifuge, and then applied into dH<sub>2</sub>O with 50  $\mu$ m of ThT. Bar: 50  $\mu$ m.  
543 (B) Western blotting of rPrP, with or without sarkosyl treatment. S1 and P1 were originally  
544 collected by centrifugation from the sample diluted with dH<sub>2</sub>O. S2 and P2 were collected from the  
545 P1 fraction treated with dH<sub>2</sub>O or sarkosyl. (C) Quantification of band intensity from P2 fraction of  
546 dH<sub>2</sub>O comparing with sarcosyl treatment (refer to Fig 4B).(D) DIC microscopic images of aged  
547 gels before (0 min) and after (30 min) PK treatment. (E) Quantification of band intensity of aged  
548 gels, with or without PK treatment (refer to Fig. 4D). (F) Western blotting of rPrP aged gels. “LPS”  
549 indicates that experiments were done under the condition of 9%/ 9% of PEG/ dextran, 120 mM of  
550 sodium thiosulfate and 10  $\mu$ M of rPrP. “dH<sub>2</sub>O” indicates that experiments were done under the  
551 condition of 9%/ 9% of PEG/ dextran, 10  $\mu$ M of rPrP without salt. “Polymer” and “Salt” indicates  
552 that the samples contain 9%/ 9% of PEG/ dextran, and 120 mM of sodium thiosulfate. “PK”

553 indicates that samples were treated with 7.5 ug/ml of PK. Each dot represents a value measured  
554 from individual sample. Solid line indicates average. Bar: SD. N=3. Statistical analysis was  
555 performed with unpaired t-tests. “n.s.” means no significant difference. (G) Confocal microscopic  
556 images of aged rPrP-gels stained with Congo-red in bright field and cross polarized. Bar: 50  $\mu$ m.  
557 (H) FTIR spectroscopic analysis of aged rPrP-gels and native rPrP. Blue line: native rPrP. Red  
558 line: Aged rPrP-gels. Arrows indicate the peak of each sample.

559 **Fig. 5 Hypothetical model for droplet formation and phase transition.**

560 (A) Left: Prion protein molecules are equally dissolved in PEG (yellow green) and dextran (blue)  
561 fractions without kosmotropic anions. Middle: Prion protein molecules assemble each other *via*  
562 IDRs and form droplets at the interface of ATPS by adding kosmotropic anions (purple dots). PEG  
563 may bind to prion protein but with no change in its structure. Right: Possible IDRs (red line)  
564 interaction inside droplets; Kosmotropic anions neutralize the positive charge of IDRs and induce  
565 interaction between them. Dipole–dipole interaction (green) of glycine (G) and glutamine (Q), and  
566  $\pi$ – $\pi$  interaction (yellow) of tryptophan (W) are expected to underlie in phase separation and  
567 transition (refer to (32)). (B) Hypothetical model of liquid-solid phase transition. In a fresh droplet,  
568 the IDRs of prion protein may construct a cross  $\beta$ -sheet structure (dotted arrow). As the droplet  
569 matures,  $\beta$ -sheet conversion is initiated from IDRs, forming an insoluble gel. Finally, the entire  
570 molecule is converted to  $\beta$ -sheet-rich structure and oligomerized, resulting in proteinase-resistant

571 gel. Yellow green: PEG fraction and PEG molecule. Light blue: Dextran fraction. Red: IDRs of  
572 rPrP. Dark blue: constructed region of rPrP including 3  $\alpha$ -helices. Purple dots: kosmotropic anions.  
573 Arrows:  $\beta$ -sheet structure.

574

### 575 **Legend for supplemental Figures**

#### 576 **Sup. Fig. 1 rPrP undergoes liquid phase separation above the binodal curve of ATPS.**

577 (A) DIC and fluorescence microscopic images of rPrP (10  $\mu$ M) mixed with 10% dextran (Top) or  
578 10% PEG (bottom) with 120 mM thiosulfate sodium. rPrP salted out as ThT-positive aggregates.

579 (B) DIC and fluorescence microscopic images of the bottom of the well after 24 h of incubation  
580 are shown in Fig. 1B. ThT-positive amorphous aggregation precipitated in 2% –4%/2 – 4%,  
581 whereas a puddle-like droplet (white arrowhead) and amorphous aggregation coexisted with  
582 spherical-shaped precipitates in 6%/ 6%, and only spherical precipitates were observed in the  
583 9%/ 9% condition.

584 (B) Box-and-whisker plots for ThT fluorescence intensity of each polymer concentration after 24  
585 h of incubation. The upper and lower whiskers represent the full range of values. The central  
586 horizontal lines indicate median values. Boxes illustrate the ranges between the lower and upper  
587 quartiles. N=9. \*P<0.0001. Statistical analysis was performed with one-way ANOVA, followed by  
588 the Tukey-Kramer test.

589 **Sup. Fig. 2 Droplet formation efficiency corresponding to rPrP concentration.**

590 (A) DIC and fluorescence microscopic images of rPrP at each concentration after 24 h of  
591 incubation.

592 (B) Quantification of ThT fluorescence intensity for each rPrP concentration after 24 h of  
593 incubation. The upper and lower whiskers represent the full range of values. The central horizontal  
594 lines indicate median values. Boxes illustrate the ranges between the lower and upper quartiles.

595 N=9. \*P<0.0001. Statistical analysis was performed with one-way ANOVA, followed by the Tukey-  
596 Kramer test.

597 **Sup. Fig. 3 Effect of salts and different pH values on droplet formation.**

598 (A) DIC and fluorescence microscopic images of the interface of wells after 24 h of incubation  
599 with various salts. Left: DIC. Middle: fluorescence microscopic images Right: Acquired with high  
600 exposure.

601 (B) Quantification of the fluorescence intensity according to the salts. The upper and lower  
602 whiskers represent the full range of values. The central horizontal lines indicate median values.

603 Boxes illustrate the ranges between the lower and upper quartiles. N=9. \*P<0.0001. Statistical  
604 analysis was performed with one-way ANOVA, followed by the Tukey-Kramer test.

605 (C) DIC and fluorescence microscopic images at each pH after 24 h of incubation.

606 **Sup. Fig. 4 Mouse prion protein behaves similar to human prion protein.**



607 (A) DIC and fluorescence microscopic images of Mo-rPrP (23-231): dH<sub>2</sub>O and Na<sub>2</sub>S<sub>2</sub>O<sub>3</sub> at 0 min,

608 1 h, and 30 h.

609 (B) ThT fluorescence intensity of Mo-rPrP (23-231): dH<sub>2</sub>O and Mo-rPrP (23-231):Na<sub>2</sub>S<sub>2</sub>O<sub>3</sub>

610 measured after 48 h. Each dot represents a value measured in 3 independent experiments. Line

611 indicates the average of each group. Error bars represent the standard deviation. N=9.

612

613

## Graphical abstract

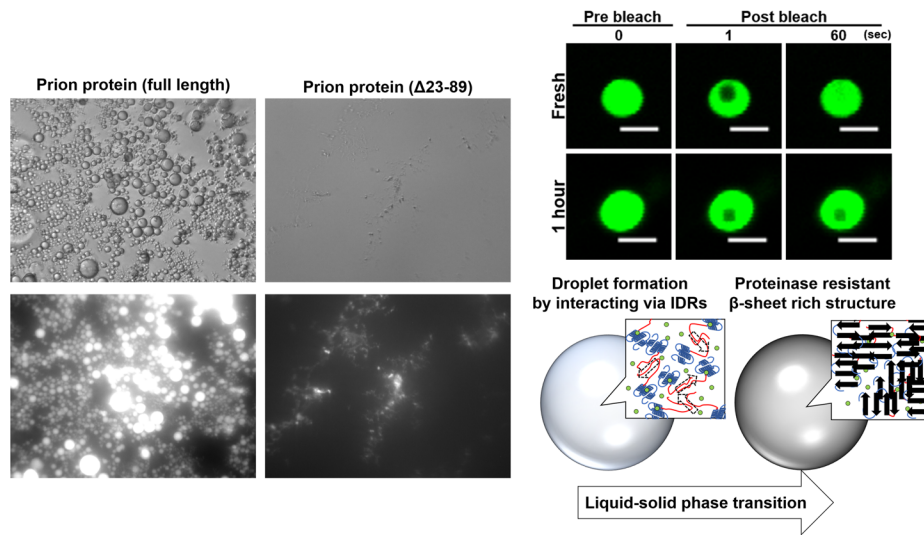

# Fig 1

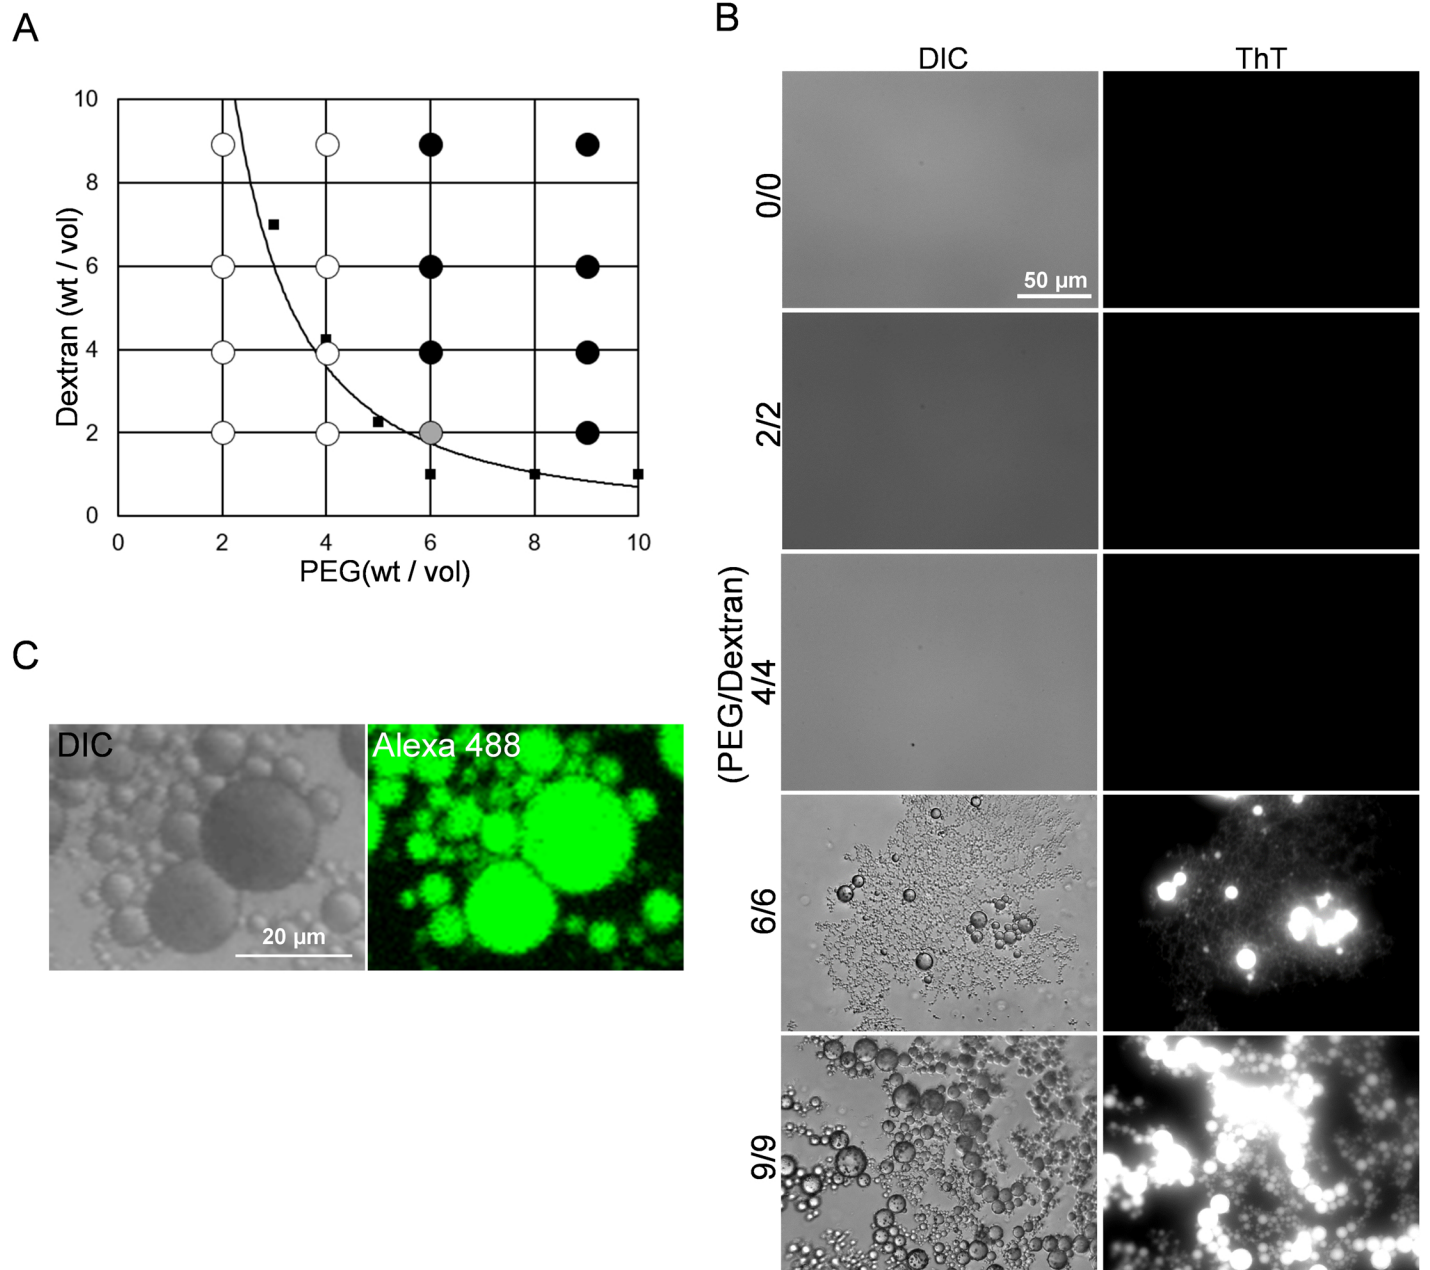

**Fig 2**

bioRxiv preprint doi: <https://doi.org/10.1101/2020.01.25.919340>; this version posted July 14, 2020. The copyright holder for this preprint (which was not certified by peer review) is the author/funder. All rights reserved. No reuse allowed without permission.

**A**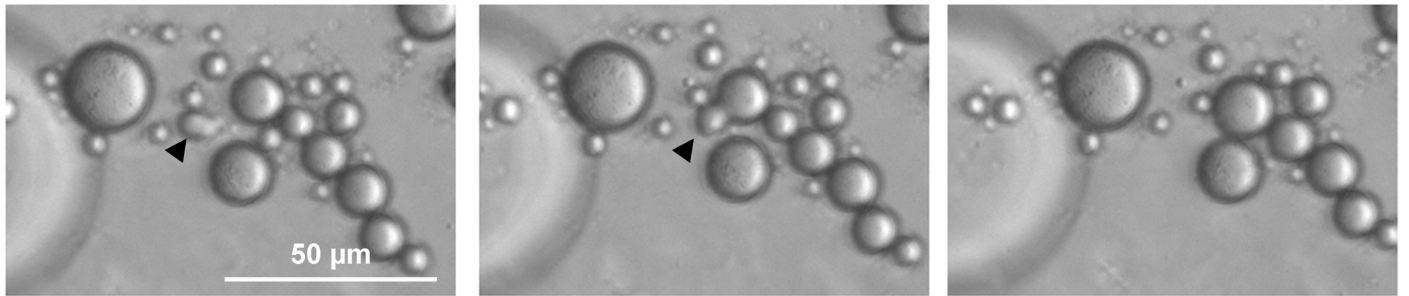**B**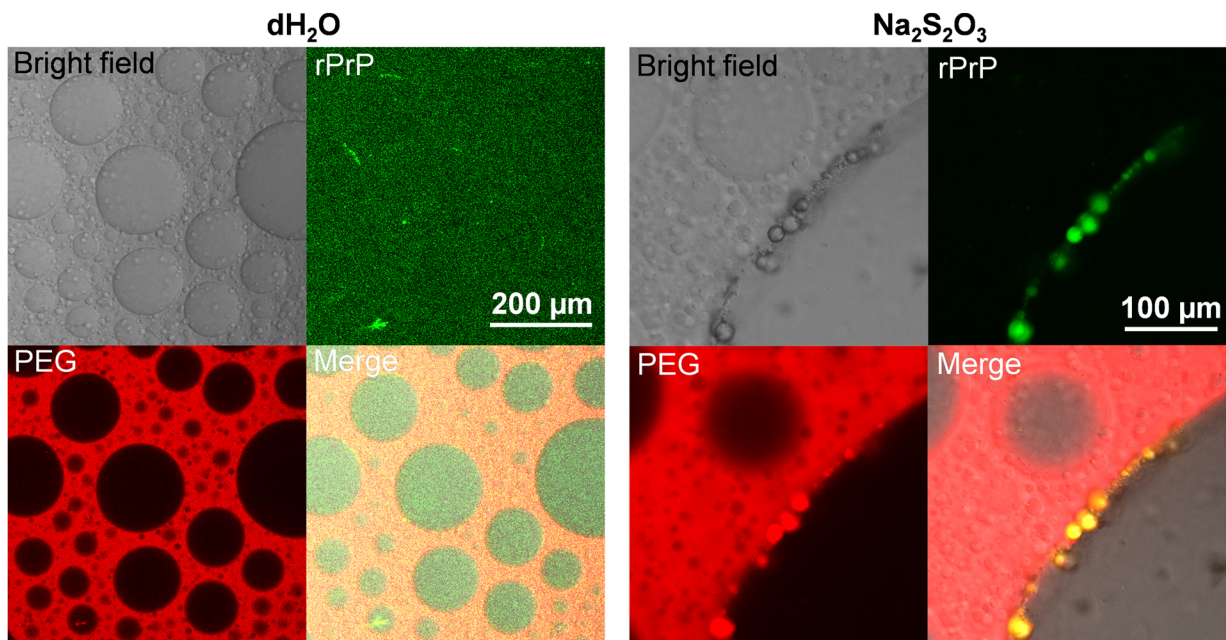**C**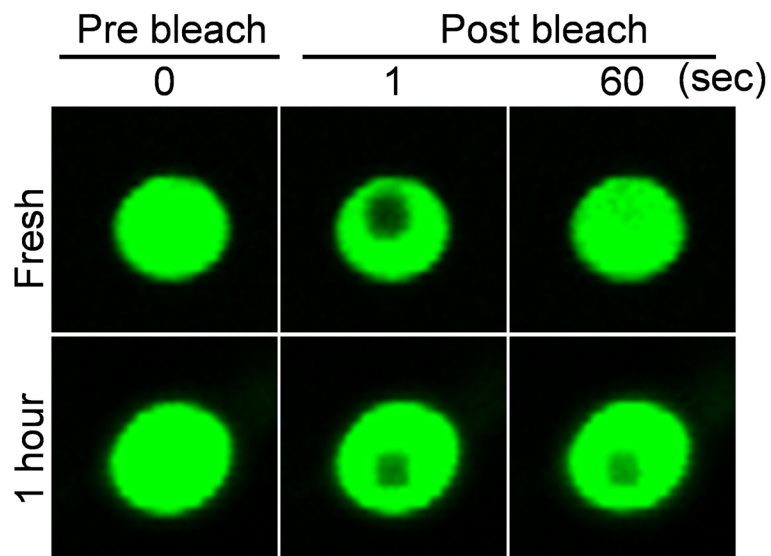**D**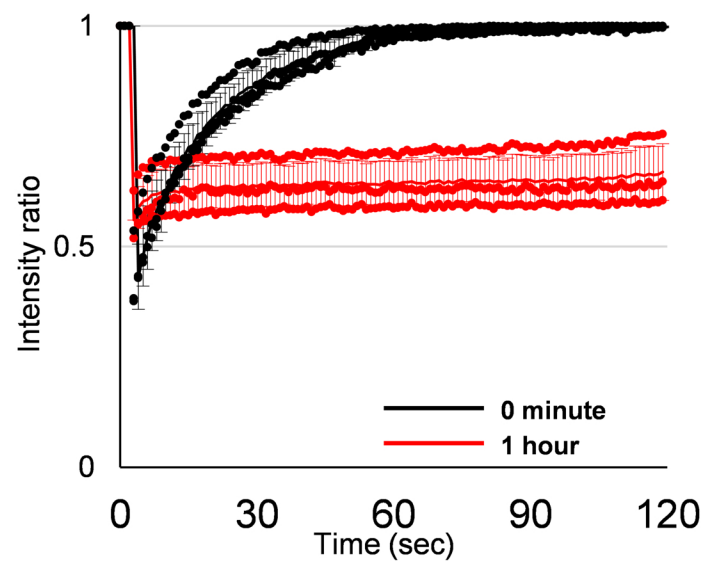

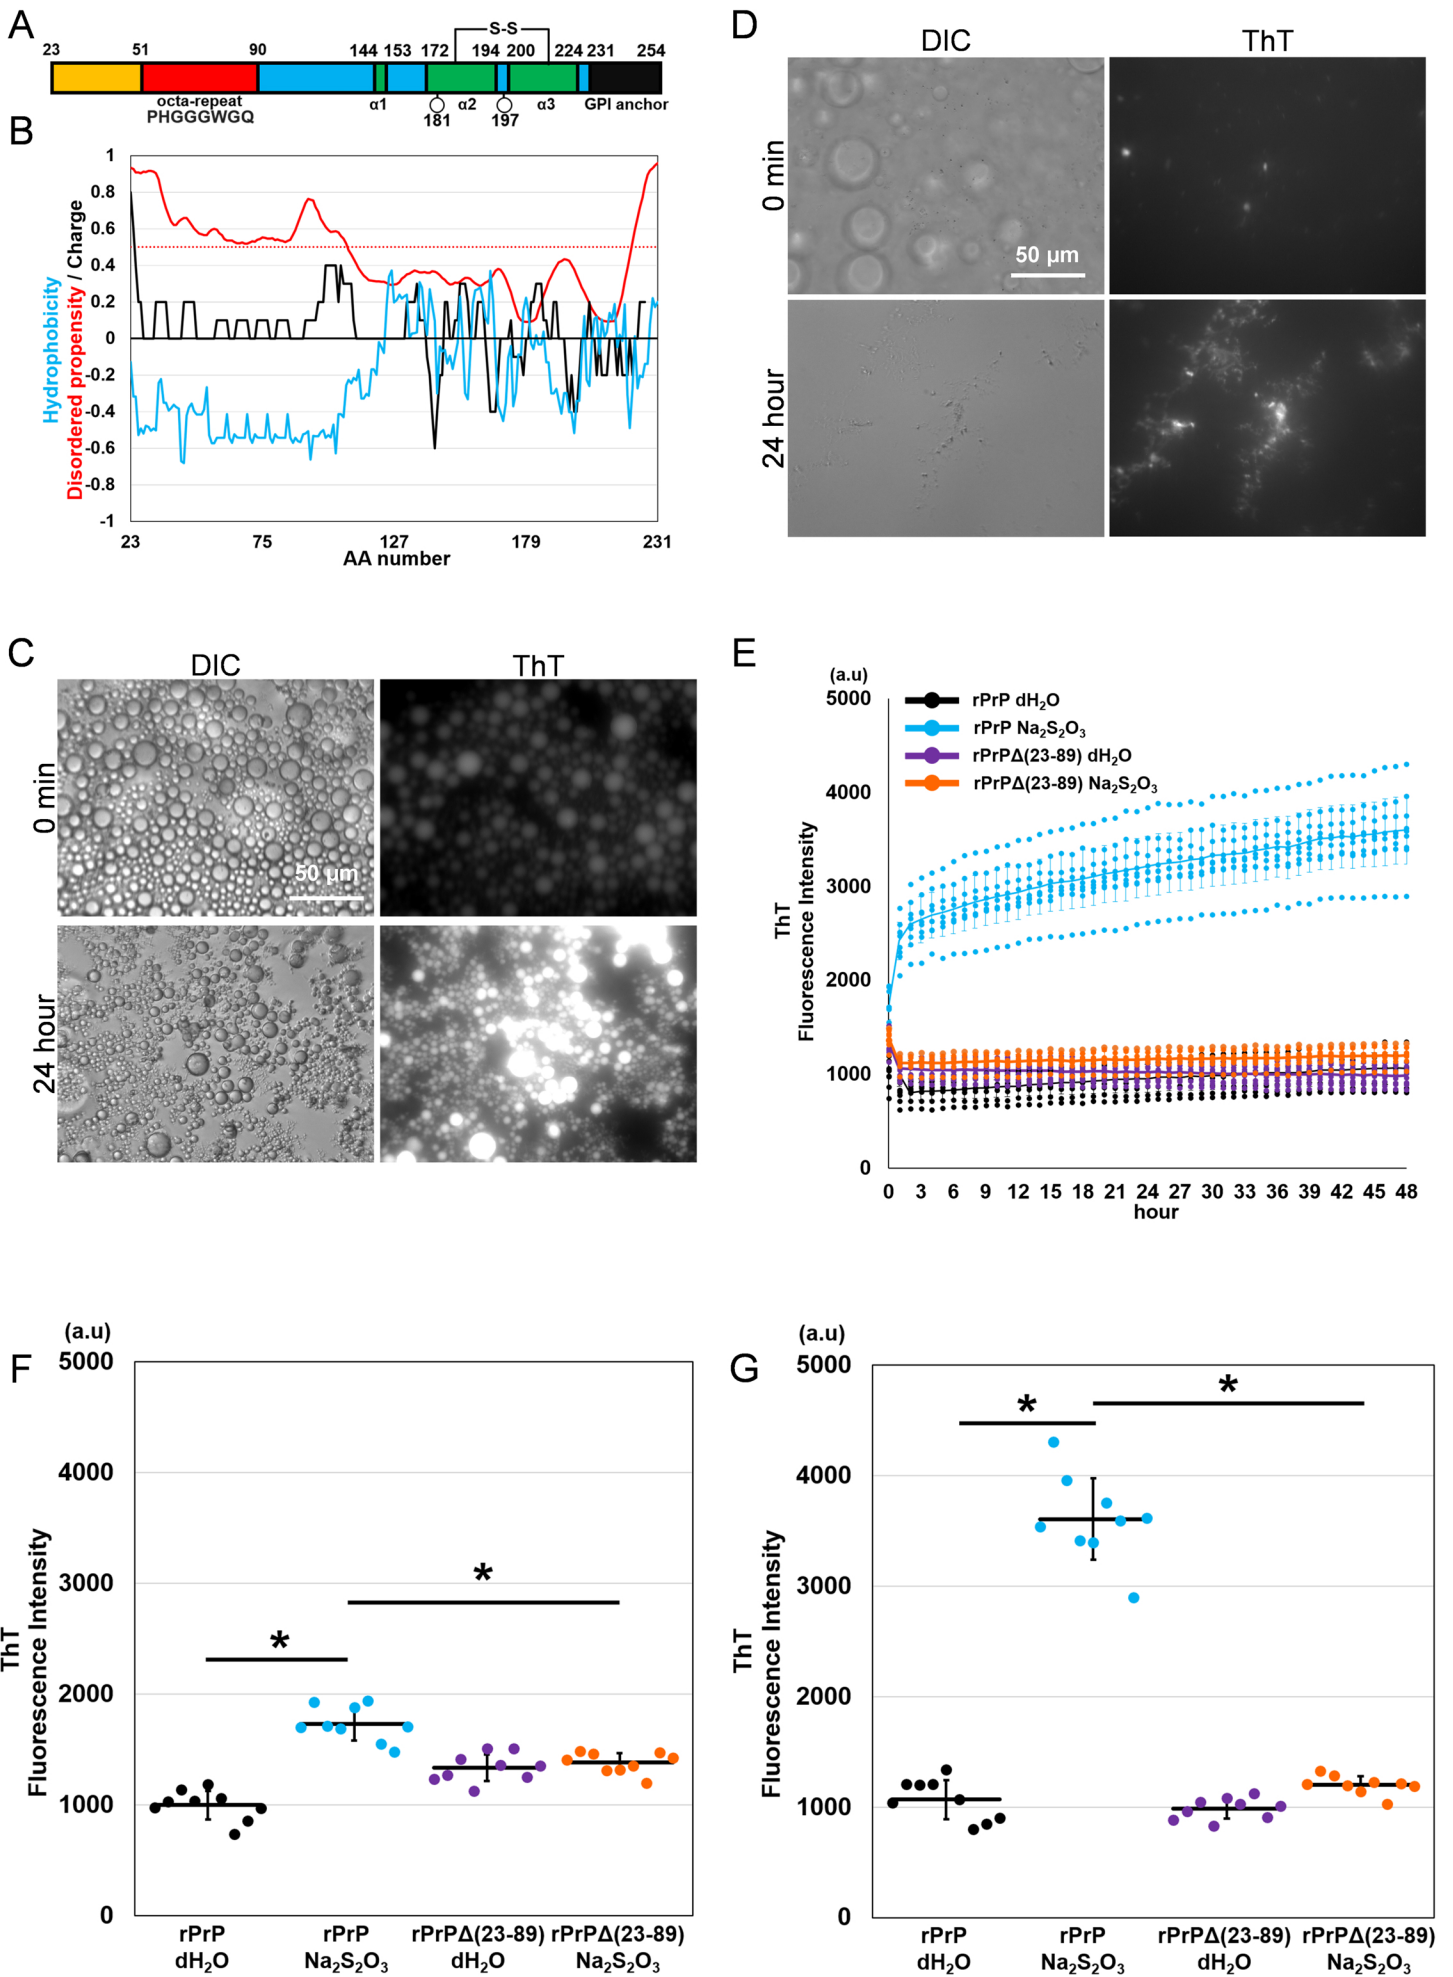



# Fig 4

bioRxiv preprint doi: <https://doi.org/10.1101/2020.01.25.919340>; this version posted July 14, 2020. The copyright holder for this preprint (which was not certified by peer review) is the author/funder. All rights reserved. No reuse allowed without permission.

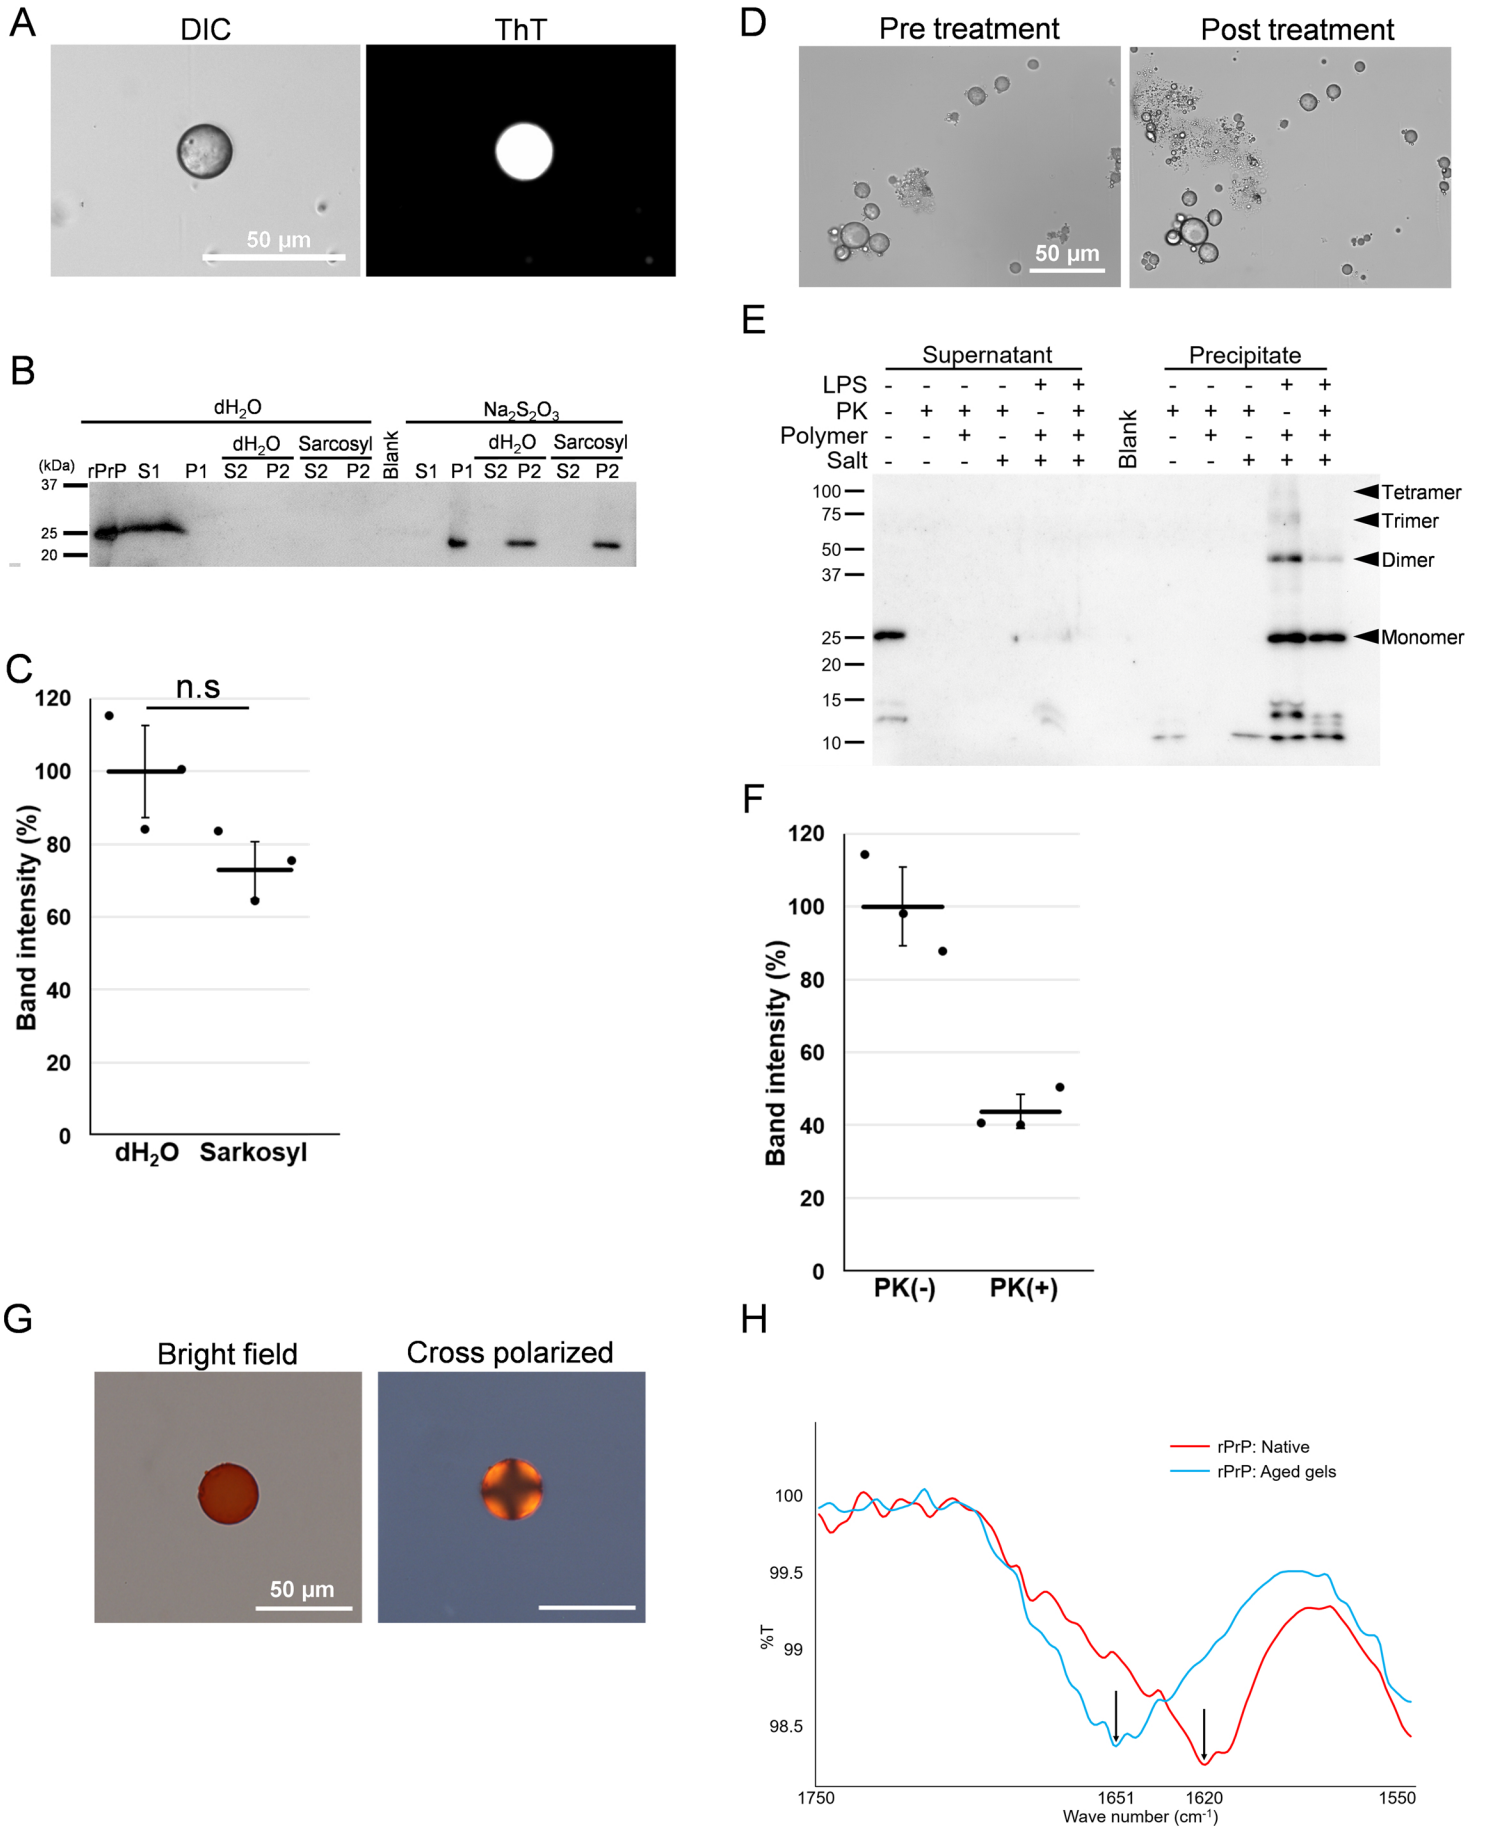

# Fig. 5

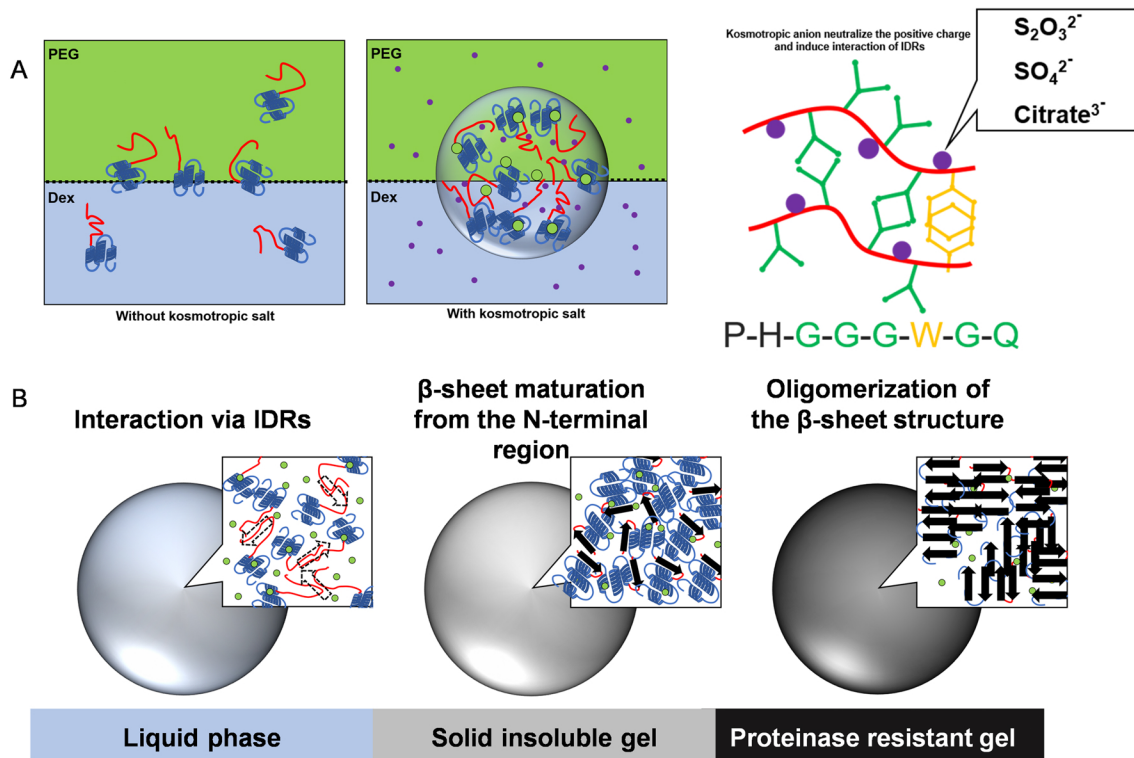

# Sup.Fig 1

bioRxiv preprint doi: <https://doi.org/10.1101/2020.01.25.919340>; this version posted July 14, 2020. The copyright holder for this preprint (which was not certified by peer review) is the author/funder. All rights reserved. No reuse allowed without permission.

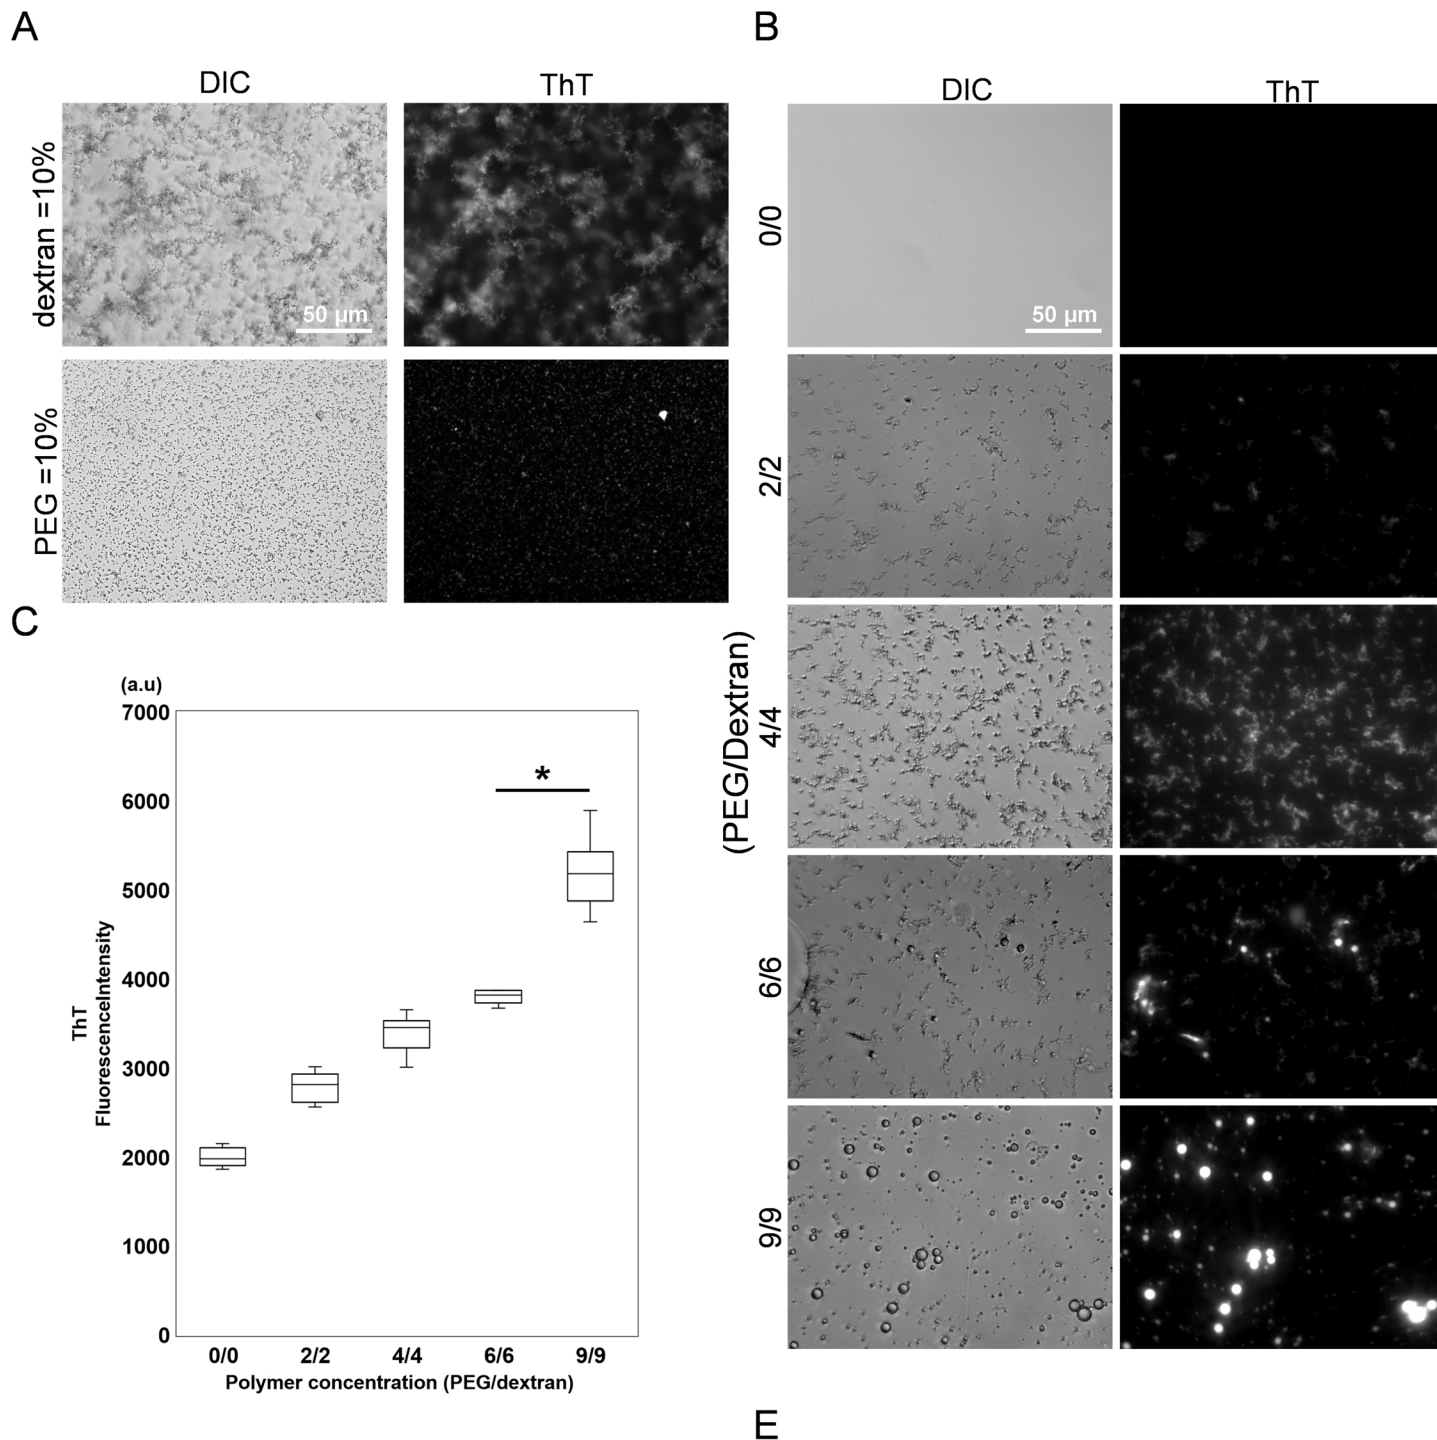



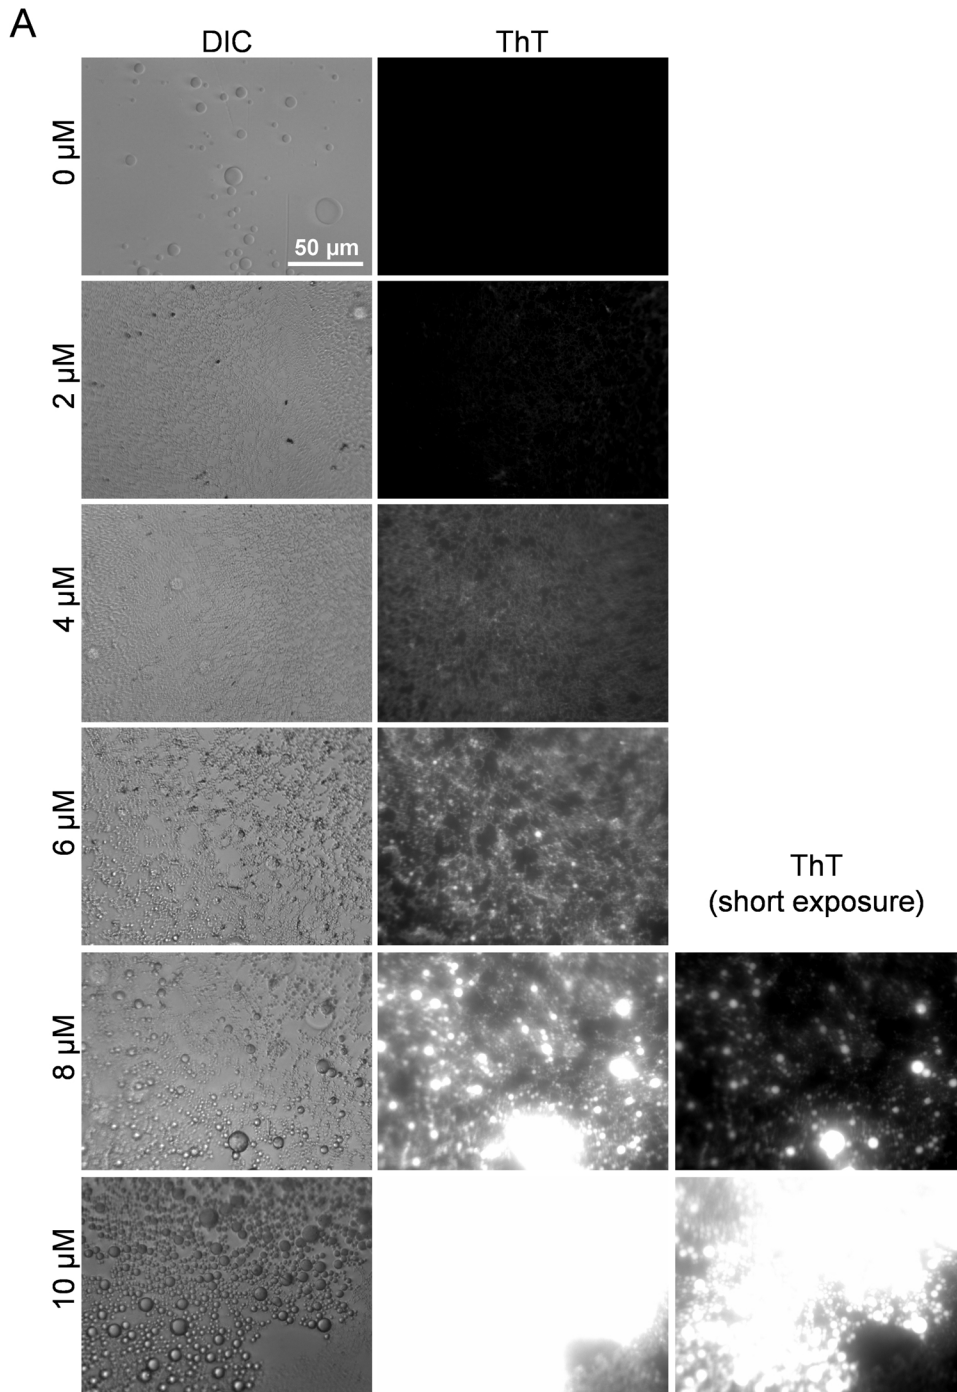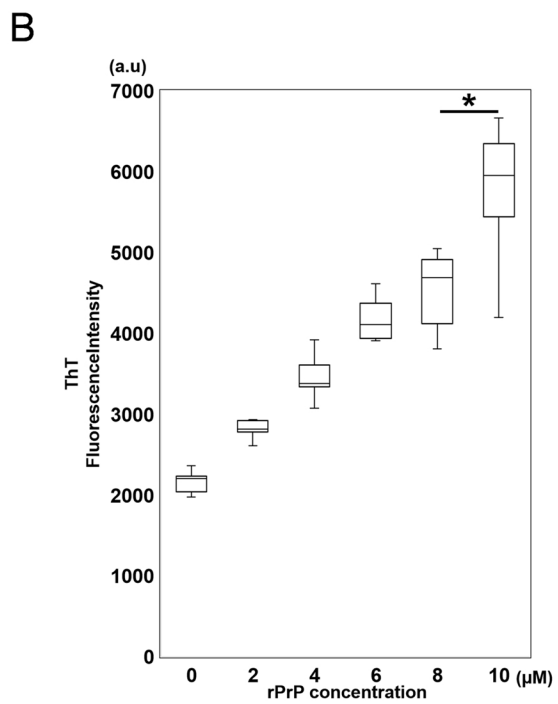

# Sup. Fig 3

bioRxiv preprint doi: <https://doi.org/10.1101/2020.01.25.919340>; this version posted July 14, 2020. The copyright holder for this preprint (which was not certified by peer review) is the author/funder. All rights reserved. No reuse allowed without permission.

A

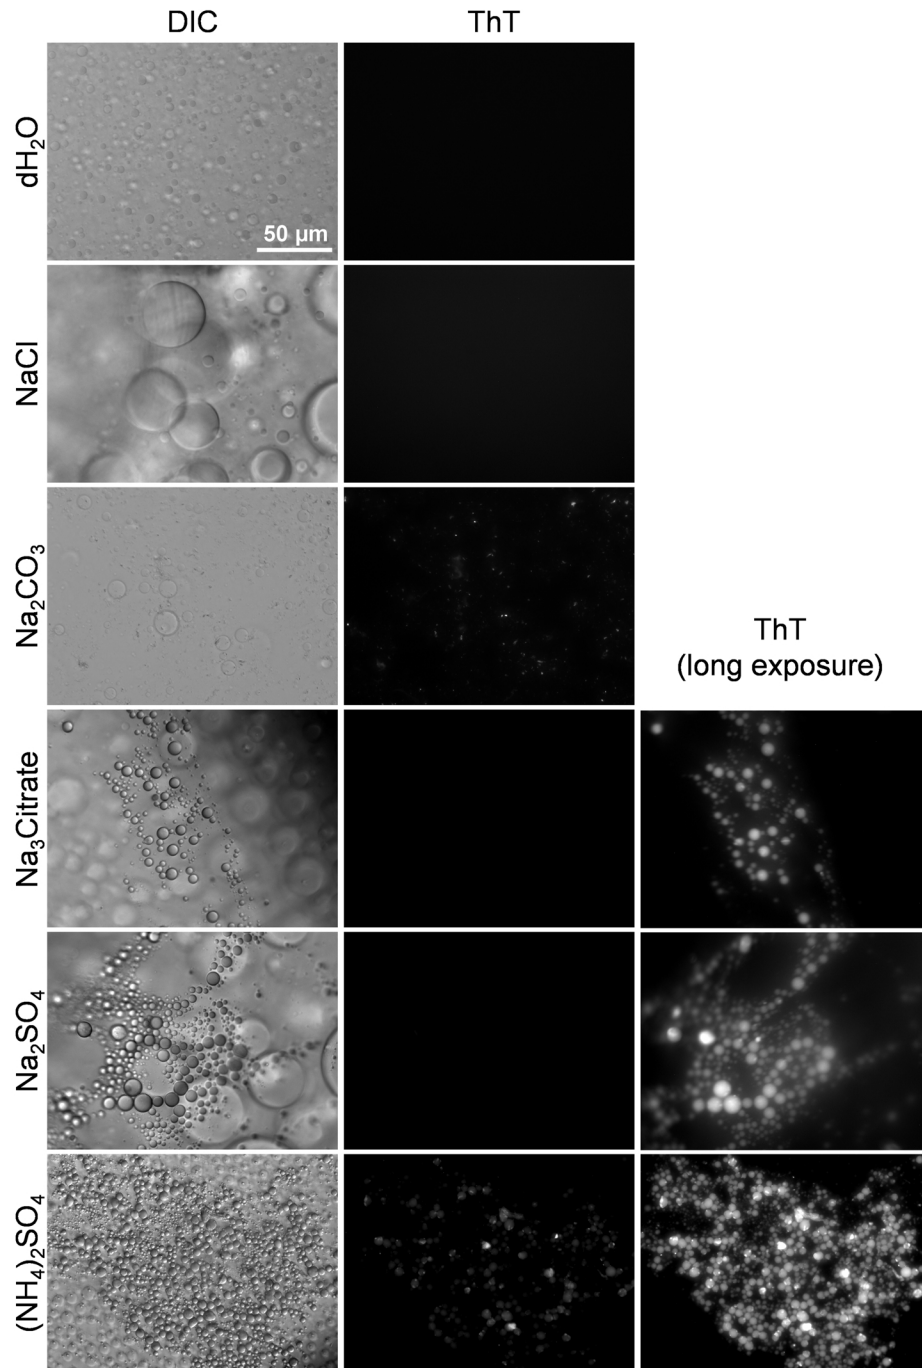

B

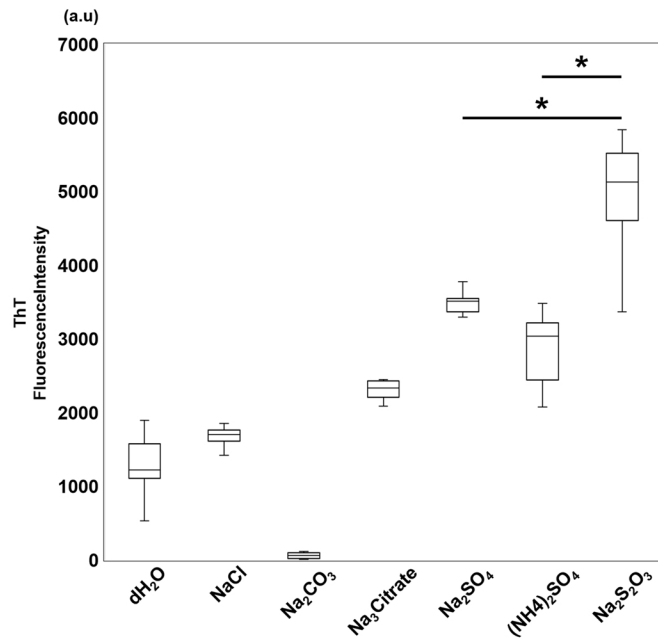

C

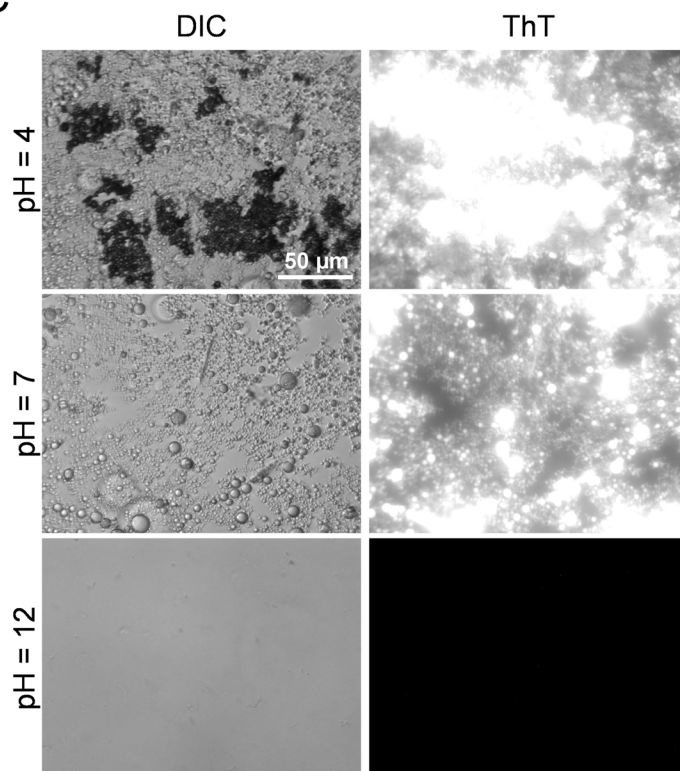

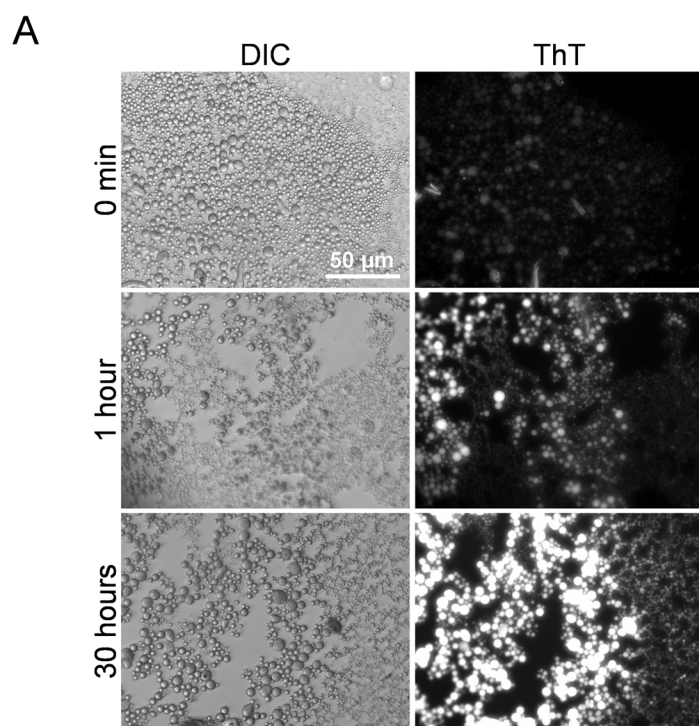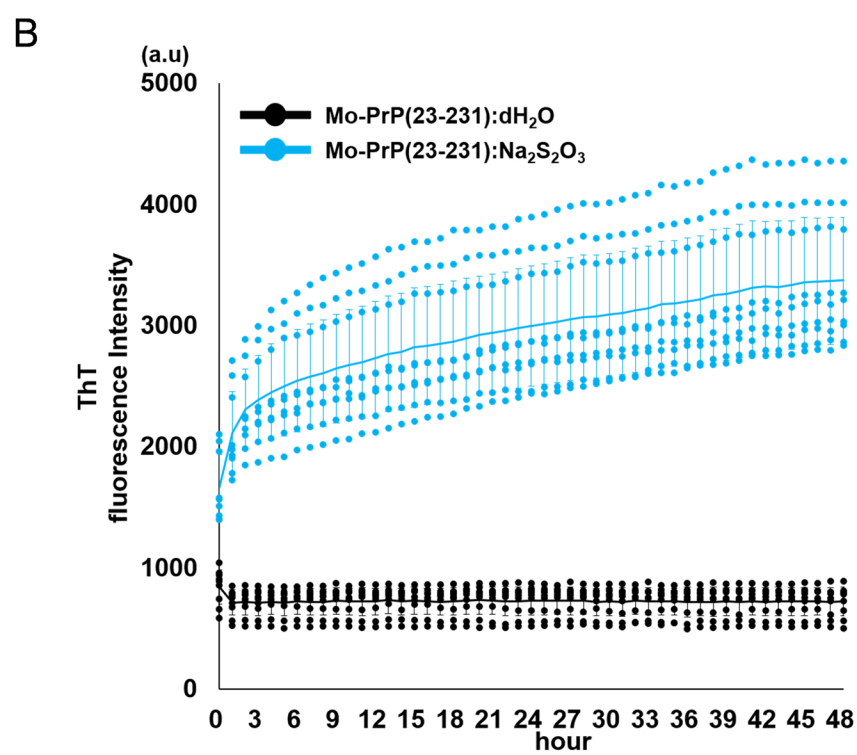

Source: https://www.biorxiv.org/content/10.1101/2020.01.25.919340v3.full.pdf
